# Supplementary material for: Fe/S cluster catalyzed cascade cyclization of N,S-1,6-enynes for the synthesis of thieno[3,4-b]indoles
Source: Royal Society of Chemistry journal article supplement (doi:10.1039/d3qo00697b), 2023-01-01

Supporting Information

**Fe/S Cluster Catalyzed Cascade Cyclization of N,S-1,6-Enynes for the Synthesis  
of Thieno[3,4-*b*]indoles**

Zhuqing Liu,<sup>a,c,+</sup> Shaobin Sun,<sup>a,+</sup> and Jiang Lou<sup>\*,a,b</sup>

<sup>a</sup> State Key Laboratory of Biobased Material and Green Papermaking, Qilu University of Technology, Shandong Academy of Sciences, Jinan 250353, China

<sup>b</sup> State Key Laboratory of Pulp and Paper Science & Technology of Ministry of Education, Qilu University of Technology, Shandong Academy of Sciences, Jinan 250353, China

<sup>c</sup> Advanced Research Institute for Multidisciplinary Science, Qilu University of Technology, Shandong Academy of Sciences, Jinan, 250353, China

E-mail: jlou@qlu.edu.cn

**Experimental procedures and analytical data**

| Contents:                                                  | page |
|------------------------------------------------------------|------|
| 1. General considerations                                  | 2    |
| 2. Experimental procedures                                 | 2    |
| 3. X-Ray crystallographic studies                          | 4    |
| 4. Analytical data                                         | 6    |
| 5. Copies of NMR spectra for Thieno[3,4- <i>b</i> ]indoles | 20   |

## 1. General considerations

The solvents were dried and distilled prior to use by the literature methods.  $^1\text{H}$  and  $^{13}\text{C}\{^1\text{H}\}$  NMR spectra were recorded on a 400 MHz spectrometer and all chemical shift values refer to  $\text{CDCl}_3$  ( $\delta(^1\text{H})$ , 7.26 ppm;  $\delta(^{13}\text{C})$ , 77.16 ppm). The HRMS analysis was obtained on a Waters GC-TOF CA156 mass spectrometer. All the melting points were uncorrected. X-Ray Crystallographic analysis was achieved by the Analysis Center, Dalian Institute of Chemical Physics, Chinese Academy of Sciences. Analytical TLC plates were viewed by UV light (254 nm). Column chromatographic purifications were performed on silica gel 160. All the chemical reagents were purchased from commercial sources and used as received unless otherwise indicated. The starting materials  $\alpha$ -oxo ketene *S,S*-acetals,<sup>1,2</sup> 2-(arylethynyl)anilines,<sup>3</sup> 2-(prop-1-yn-1-yl)anilines,<sup>4,5</sup> *N,S*-1,6-enynes **1** and enyne **6**<sup>6</sup> were prepared by the reported procedures.

## References

1. X. G. Yang, K. K. Wu, P. Wu, J. P. Chen, C. L. Sun and Z. K. Yu, *Chem. - Eur. J.*, 2015, **21**, 9323-9327.
2. X. G. Yang, Z. Q. Liu, C. L. Sun, J. P. Chen and Z. K. Yu, *Chem. - Eur. J.*, 2015, **21**, 14085-14094.
3. C. M. Le, T. Sperger, R. Fu, X. Hou, Y. H. Lim, F. Schoenebeck, M. Lautens, *J. Am. Chem. Soc.*, 2016, **138**, 14441-14448.
4. F. Nissen and H. Detert, *Eur. J. Org. Chem.*, 2011, **2011**, 2845-2853.
5. C. Maaliki, Y. Chevalier, E. Thiery and J. Thibonnet, *Tetrahedron Lett.*, 2016, **57**, 3358-3362.
6. Z. Q. Liu, R. L. Gao, J. Lou, Y. He, and Z. K. Yu, *Adv. Synth. Catal.*, 2018, **19**, 3660-3663.

## 2. Experimental procedures

### 2.1 Synthesis of 4*H*-thieno[3,4-*b*]indoles (2)

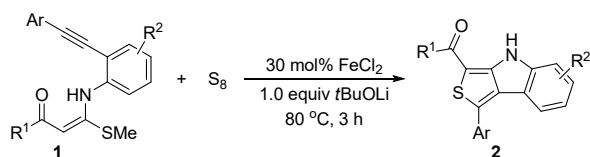

**A typical procedure for the synthesis of 2 – *Synthesis of phenyl(1-phenyl-4H-thieno[3,4-b]indol-3-yl)methanone (2a)*:** A mixture of **1a** (71 mg, 0.2 mmol), FeCl<sub>2</sub> (8 mg, 0.06 mmol), S<sub>8</sub> (51 mg, 0.2 mmol), and *t*BuOLi (16 mg, 0.2 mmol) in 2 mL DMF was stirred at 80 °C for 3 h under an argon atmosphere. After cooled to ambient temperature, the mixture was evaporated all the volatiles under reduced pressure. The resultant residue was purified by silica gel column chromatography (eluent: petroleum ether (60-90 °C)/ethyl acetate = 50:1, v/v) to afford **2a** as a yellow solid (52 mg, 74%).

## 2.2 Control Experiments

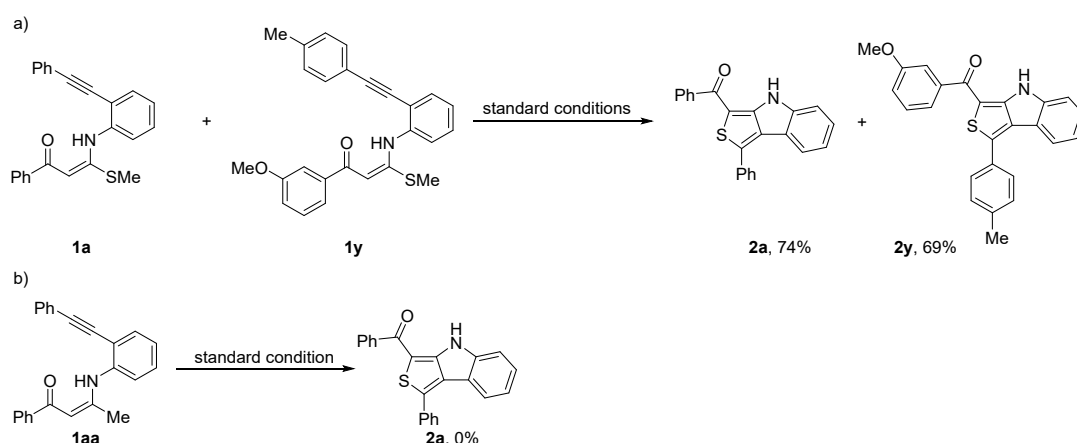

**Scheme S1.** Control Experiments

A mixture of **1a** (37 mg, 0.1 mmol), **1y** (41 mg, 0.1 mmol), FeCl<sub>2</sub> (8 mg, 0.06 mmol), S<sub>8</sub> (51 mg, 0.2 mmol), and *t*BuOLi (16 mg, 0.2 mmol) in 2 mL DMF was stirred at 80 °C for 3 h under an argon atmosphere. After cooled to ambient temperature, the mixture was evaporated all the volatiles under reduced pressure. The resultant residue was purified by silica gel column chromatography (eluent: petroleum ether (60-90 °C)/ethyl acetate = 30:1, v/v) to successively afford products **2a** (26 mg, 74%) and **2y** (27 mg, 69%).

### 2.2.1 Radical trapping experiments

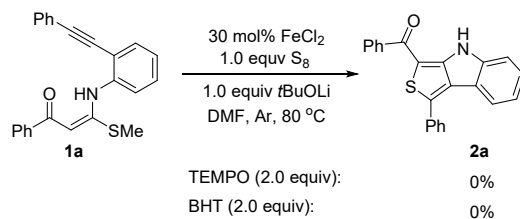

### Scheme S2. Radical trapping experiments

A mixture of **1a** (71 mg, 0.2 mmol), FeCl<sub>2</sub> (8 mg, 0.06 mmol), S<sub>8</sub> (51 mg, 0.2 mmol), *t*BuOLi (16 mg, 0.2 mmol) and TEMPO (63 mg, 0.4 mmol) or BHT (88 mg, 0.4 mmol) in 3 mL DMF was stirred at 80 °C for 3 h under an argon atmosphere separately. After compound **1a** was completely consumed by TLC monitoring on silica gel, the yields were carefully checked by <sup>1</sup>H NMR analysis of the target product **2a** with 1,3,5-methoxybenzene as the internal standard.

### 2.3 EPR studies

A mixture of **1a** (71 mg, 0.2 mmol), FeCl<sub>2</sub> (8 mg, 0.06 mmol), S<sub>8</sub> (51 mg, 0.2 mmol), and *t*BuOLi (16 mg, 0.2 mmol) in 2 mL DMF was stirred at 80 °C for 15 min under an argon atmosphere. The resultant mixture was used for the EPR studies at 112 K and an EPR signal was detected at 3320 G.

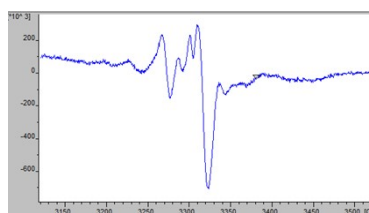

Scheme S3. EPR studies

### 3. X-Ray crystallographic studies

Single crystals for the X-ray diffraction studies for compounds **2a** was carried out on a SMART APEX diffractometer with graphite-monochromated Mo radiation ( $\lambda = 0.71073 \text{ \AA}$ ). Cell parameters were obtained by global refinement of the positions of all collected reflections. Intensities were corrected for Lorentz and polarization effects and empirical absorption. The structures were solved by direct methods and refined by full-matrix least squares on  $F^2$ . All non-hydrogen atoms were refined

anisotropically. All hydrogen atoms were placed in calculated positions. Structure solution and refinement were performed by using the SHELXL-97 package. The X-ray crystallographic files, in CIF format, are available from the Cambridge Crystallographic Data Centre on quoting the deposition numbers CCDC 1857986 for **2a**. Copies of this information may be obtained free of charge from The Director, CCDC, 12 Union Road, Cambridge CB2 IEZ, UK (Fax: +44-1223-336033; e-mail: deposit@ccdc.cam.ac.uk or www: <http://www.ccdc.cam.ac.uk>).

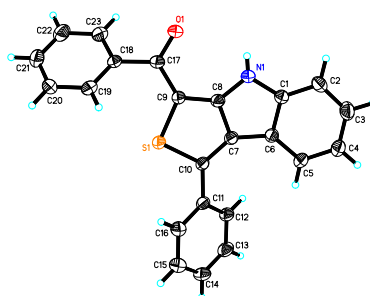

**Fig. 1** Molecular structure of compound **2a**.  
Perspective view of **2a** with thermal ellipsoids at 30% probability level.

**Table 1** Crystal data and structure refinement for compound **2a**

|                                 |                                       |                   |
|---------------------------------|---------------------------------------|-------------------|
| Identification code             | LZQE-258                              |                   |
| Empirical formula               | C <sub>23</sub> H <sub>15</sub> N O S |                   |
| Formula weight                  | 353.42                                |                   |
| Temperature                     | 293(2) K                              |                   |
| Wavelength                      | 0.71073 Å                             |                   |
| Crystal system                  | Monoclinic                            |                   |
| Space group                     | P 21                                  |                   |
| Unit cell dimensions            | a = 8.8280(10) Å                      | α = 90°.          |
|                                 | b = 19.5033(17) Å                     | β = 102.118(12)°. |
|                                 | c = 10.3158(12) Å                     | γ = 90°.          |
| Volume                          | 1736.6(3) Å <sup>3</sup>              |                   |
| Z                               | 4                                     |                   |
| Density (calculated)            | 1.352 Mg/m <sup>3</sup>               |                   |
| Absorption coefficient          | 0.198 mm <sup>-1</sup>                |                   |
| F(000)                          | 736                                   |                   |
| Crystal size                    | 0.180 x 0.150 x 0.130 mm <sup>3</sup> |                   |
| Theta range for data collection | 2.765 to 25.994°.                     |                   |

|                                   |                                             |
|-----------------------------------|---------------------------------------------|
| Index ranges                      | -10<=h<=10, -24<=k<=20, -10<=l<=12          |
| Reflections collected             | 9958                                        |
| Independent reflections           | 5743 [R(int) = 0.0434]                      |
| Completeness to theta = 25.242°   | 99.8 %                                      |
| Absorption correction             | Semi-empirical from equivalents             |
| Max. and min. transmission        | 1.0000 and 0.5402                           |
| Refinement method                 | Full-matrix least-squares on F <sup>2</sup> |
| Data / restraints / parameters    | 5743 / 3 / 474                              |
| Goodness-of-fit on F <sup>2</sup> | 1.060                                       |
| Final R indices [I>2sigma(I)]     | R1 = 0.0491, wR2 = 0.1153                   |
| R indices (all data)              | R1 = 0.0650, wR2 = 0.1321                   |
| Absolute structure parameter      | 0.39(6)                                     |
| Largest diff. peak and hole       | 0.350 and -0.264 e.Å <sup>-3</sup>          |

#### 4. Analytical data

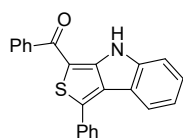

#### Phenyl(1-phenyl-4*H*-thieno[3,4-*b*]indol-3-yl)methanone (2a)

This compound was prepared according to general procedure and purified by flash chromatography on silica gel (hexane/AcOEt, 10:1) to provide the corresponding product yellow solid, 52 mg, yield 74%, , m.p.: 172-173 °C. <sup>1</sup>H NMR (400 MHz, 23 °C, D<sub>6</sub>-DMSO) δ 11.70 (br, 1 H, NH), 8.00 and 7.74–7.48 (m each, 2:7 H, aromatic CH), 7.90 (t, *J* = 6.9 Hz, 3 H, aromatic CH), 7.42 (t, *J* = 7.4 Hz, 1 H, aromatic CH), 7.14 (t, *J* = 7.5 Hz, 1 H, aromatic CH). <sup>13</sup>C{<sup>1</sup>H} NMR (100 MHz, 23 °C, D<sub>6</sub>-DMSO) δ 185.5 (Cq, CO), 150.2 , 148.7 , 141.1 , 140.1 , 133.2 , 132.3 , 130.2 , 130.1 , 129.3 , 129.1 , 128.6 , 128.5 , 127.9 , 121.3 , 120.8 , 118.6 , 113.3 and 107.4 (aromatic CH). HRMS (EI) calcd for C<sub>23</sub>H<sub>15</sub>NOS [M+H]<sup>+</sup>: 354.0953; Found: 354.0954.

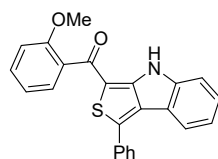

#### (2-Methoxyphenyl)(1-phenyl-4*H*-thieno[3,4-*b*]indol-3-yl)methanone (2b)

This compound was prepared according to general procedure and purified by flash chromatography on silica gel (hexane/AcOEt, 10:1) to provide the corresponding product yellow solid, 60 mg, yield 78%, m.p.: 201-202 °C. <sup>1</sup>H NMR (700 MHz, 23 °C, D<sub>6</sub>-DMSO) δ 11.63 (br, 1 H, NH), 7.88 (d, *J* = 7.8 Hz, 1 H, aromatic CH), 7.81 (m, 2 H, aromatic CH), 7.58 (t, *J* = 7.6 Hz, 2 H, aromatic CH), 7.54 (d, *J* = 8.1 Hz, 1 H, aromatic CH), 7.53–7.49 and 7.40 (m each, 2:1 H, aromatic CH), 7.47 (dd, *J* = 7.4 and 1.6 Hz, 1 H, aromatic CH), 7.19 (d, *J* = 8.4 Hz, 1 H, aromatic CH), 7.12 (dd, *J* = 11.1 and 4.0 Hz, 1 H, aromatic CH), 7.07 (dd, *J* = 10.9 and 4.0 Hz, 1 H, aromatic CH), 3.79 (s, 3 H, OCH<sub>3</sub>). <sup>13</sup>C{<sup>1</sup>H} (175 MHz, 23 °C, D<sub>6</sub>-DMSO) δ 184.9 (Cq, CO), 156.0 (Cq, C-OCH<sub>3</sub>), 148.2, 148.1, 140.2, 132.8, 129.9, 128.6, 118.1 and 109.8 (Cq), 131.6, 129.5, 129.4, 128.2, 127.9, 127.2, 120.7, 120.3, 120.2, 112.7 and 112.0 (aromatic CH), 55.5 (OCH<sub>3</sub>). HRMS (EI) calcd for C<sub>24</sub>H<sub>17</sub>NO<sub>2</sub>S [M+H]<sup>+</sup>: 384.1058; Found: 384.1052.

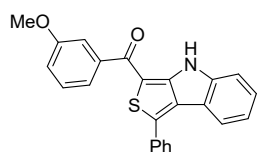

**(3-Methoxyphenyl)(1-phenyl-4H-thieno[3,4-b]indol-3-yl)methanone (2c)**

This compound was prepared according to general procedure and purified by flash chromatography on silica gel (hexane/AcOEt, 10:1) to provide the corresponding product yellow solid, 57 mg, yield 75%, m.p.: 200-201 °C. <sup>1</sup>H NMR (400 MHz, 23 °C, D<sub>6</sub>-DMSO) δ 11.67 (br, 1 H, NH), 7.89 and 7.47 (m each, 3:6 H, aromatic CH), 7.62 (t, *J* = 7.4 Hz, 2 H, aromatic CH), 7.21 (dd, *J* = 7.9 and 1.5 Hz, 1 H, aromatic CH), 7.13 (t, *J* = 7.5 Hz, 1 H, aromatic CH), 3.85 (s, 3 H, OCH<sub>3</sub>). <sup>13</sup>C{<sup>1</sup>H} NMR (100 MHz, 23 °C, D<sub>6</sub>-DMSO) δ 185.1 (Cq, CO), 159.8 (Cq, C-OCH<sub>3</sub>), 150.1, 148.7, 141.4, 141.1, 133.1, 129.1, 118.6 and 107.4 (Cq), 130.4, 130.1, 130.0, 128.6, 127.8, 121.2, 120.7, 120.6, 117.9, 113.5 and 113.2 (aromatic CH), 55.8 (OCH<sub>3</sub>). HRMS (EI) calcd for C<sub>24</sub>H<sub>17</sub>NO<sub>2</sub>S [M+H]<sup>+</sup>: 384.1058; Found: 384.1057.

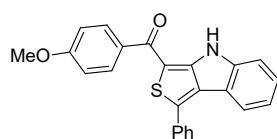

#### (4-Methoxyphenyl)(1-phenyl-4*H*-thieno[3,4-*b*]indol-3-yl)methanone (2d)

This compound was prepared according to general procedure and purified by flash chromatography on silica gel (hexane/AcOEt, 10:1) to provide the corresponding product yellow solid, 58 mg, yield 76%, m.p.: 201-202 °C. <sup>1</sup>H NMR (700 MHz, 23 °C, D<sub>6</sub>-DMSO) δ 11.58 (br, 1 H, NH), 8.00 (d, *J* = 8.7 Hz, 2 H, aromatic CH), 7.96–7.72 (m, 3 H, aromatic CH), 7.62 (t, *J* = 7.6 Hz, 2 H, aromatic CH), 7.55 (dd, *J* = 7.5 and 5.6 Hz, 2 H, aromatic CH), 7.40 (t, *J* = 7.6 Hz, 1 H, aromatic CH), 7.12 (dd, *J* = 12.1 and 5.0 Hz, 3 H, aromatic CH), 3.87 (s, 3 H, OCH<sub>3</sub>). <sup>13</sup>C{<sup>1</sup>H} (175 MHz, 23 °C, D<sub>6</sub>-DMSO) δ 183.7 (Cq, CO), 162.2 (Cq, C-OCH<sub>3</sub>), 149.6, 148.2, 139.6, 118.1 and 106.9 (Cq), 132.8, 131.8, 130.2, 129.5, 128.0, 127.2, 120.7, 120.0, 114.0 and 112.7 (aromatic CH), 55.5 (OCH<sub>3</sub>). HRMS (EI) calcd for C<sub>24</sub>H<sub>17</sub>NO<sub>2</sub>S [M+H]<sup>+</sup>: 384.1058; Found: 384.1051.

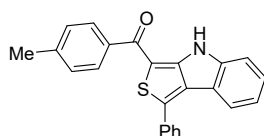

#### ((1-Phenyl-4*H*-thieno[3,4-*b*]indol-3-yl)(*p*-tolyl)methanone (2e)

This compound was prepared according to general procedure and purified by flash chromatography on silica gel (hexane/AcOEt, 10:1) to provide the corresponding product yellow solid, 51 mg, yield 70%, m.p.: 219-220 °C. <sup>1</sup>H NMR (700 MHz, 23 °C, D<sub>6</sub>-DMSO) δ 11.65 (s, 1H, aromatic CH), 7.88 (dd, *J* = 11.6, 7.8 Hz, 3H, aromatic CH), 7.78 – 7.72 (m, 2H, aromatic CH), 7.61 (t, *J* = 7.6 Hz, 2H, aromatic CH), 7.54 (dd, *J* = 12.8, 7.6 Hz, 2H, aromatic CH), 7.49-7.43 (m, 2H, aromatic CH), 7.41 (t, *J* = 7.6 Hz, 1H, aromatic CH), 7.12 (t, *J* = 7.5 Hz, 1H, aromatic CH), 2.41 (s, 3H, CH<sub>3</sub>). <sup>13</sup>C{<sup>1</sup>H} (175 MHz, 23 °C, D<sub>6</sub>-DMSO) δ 185.7 (Cq, CO), 150.1 (s), 148.7 (s), 141.0 (s), 140.1 (s), 138.7 (s), 133.2 (s), 132.9 (s), 130.2 (s), 130.1 (s), 129.1 (s), 129.1 (s), 128.9 (s), 128.6 (s), 127.9 (s), 125.7 (s), 121.2 (s), 120.8 (s), 118.6 (s), 113.3 (s), 107.6 (aromatic CH or Cq), 21.5 (CH<sub>3</sub>). HRMS (EI) calcd for C<sub>24</sub>H<sub>17</sub>NOS [M+H]<sup>+</sup>: 368.1109; Found: 368.1102.



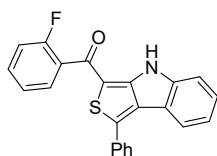

**(2-Fluorophenyl)(1-phenyl-4H-thieno[3,4-b]indol-3-yl)methanone (2f)**

This compound was prepared according to general procedure and purified by flash chromatography on silica gel (hexane/AcOEt, 10:1) to provide the corresponding product yellow solid, 50 mg, yield 68%, m.p.: 235-236 °C. <sup>1</sup>H NMR (400 MHz, 23 °C, D<sub>6</sub>-DMSO) δ 11.77 (br, 1 H, NH), 7.89 (d, *J* = 7.9 Hz, 1 H, aromatic CH), 7.86 (d, *J* = 7.3 Hz, 2 H, aromatic CH), 7.76 (t, *J* = 7.3 Hz, 1 H, aromatic CH), 7.60 and 7.41 (m each, 5:3 H, aromatic CH), 7.14 (t, *J* = 7.5 Hz, 1 H, aromatic CH). <sup>13</sup>C {<sup>1</sup>H} (176 MHz, 23 °C, D<sub>6</sub>-DMSO) δ 181.5 (Cq, CO), 158.6 (Cq and d, *J* = 248.5 Hz, C-F), 148.7, 148.2, 141.5, 132.5, 128.8, 128.2 (d, *J* = 16.0 Hz) 118.1 and 108.7 (Cq), 132.8 (d, *J* = 8.3 Hz), 129.8, 129.5, 129.4 (d, *J* = 2.7 Hz), 128.0, 127.4, 124.7, 120.6 (d, *J* = 54.6 Hz), 116.4 (d, *J* = 21.1 Hz) and 112.8 (aromatic CH). HRMS (EI) calcd for C<sub>23</sub>H<sub>14</sub>FNOS [M+H]<sup>+</sup>: 372.0858; Found: 372.0859.

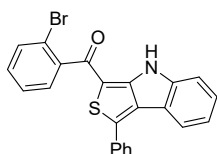

**(2-Bromophenyl)(1-phenyl-4H-thieno[3,4-b]indol-3-yl)methanone (2g)**

This compound was prepared according to general procedure and purified by flash chromatography on silica gel (hexane/AcOEt, 10:1) to provide the corresponding product yellow solid, 65 mg, yield 75%, m.p.: 206-207 °C. <sup>1</sup>H NMR (700 MHz, 23 °C, D<sub>6</sub>-DMSO) δ 11.82 (br, 1 H, NH), 7.89 (d, *J* = 7.8 Hz, 1 H, aromatic CH), 7.83, 7.54, 7.48, 7.42 and 7.14 (m each, 2:3:1:1:1 H, aromatic CH), 7.77 (d, *J* = 8.1 Hz, 1 H, aromatic CH), 7.67 (dd, *J* = 7.5 and 1.6 Hz, 1 H, aromatic CH), 7.58 (t, *J* = 7.6 Hz, 2 H, aromatic CH). <sup>13</sup>C {<sup>1</sup>H} (176 MHz, 23 °C, D<sub>6</sub>-DMSO) δ 184.3 (Cq, CO), 148.5, 148.2, 141.7, 141.3, 132.5, 128.6, 118.1 and 108.2 (Cq), 133.0, 131.6, 129.8, 128.9, 127.7, 127.4, 120.8, 120.4 and 112.8 (aromatic CH). HRMS (EI) calcd for C<sub>23</sub>H<sub>14</sub>BrNOS [M+H]<sup>+</sup>: 432.0058; Found: 432.0061.

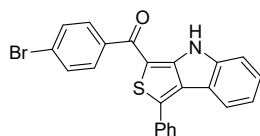

**(4-Bromophenyl)(2-phenyl-4H-thieno[3,2-b]indol-3-yl)methanone (2h)**

This compound was prepared according to general procedure and purified by flash chromatography on silica gel (hexane/AcOEt, 10:1) to provide the corresponding product yellow solid, 64 mg, yield 74%, m.p.: 209-210 °C. <sup>1</sup>H NMR (700 MHz, 23 °C, D<sub>6</sub>-DMSO) δ 11.68 (br, 1 H, NH), 7.83, 7.55, 7.41 and 7.12 (m each, 5:2:1:1 H, aromatic CH), 7.79 (d, *J* = 8.4 Hz, 2 H, aromatic CH), 7.62 (t, *J* = 7.6 Hz, 2 H, aromatic CH). <sup>13</sup>C{<sup>1</sup>H} (176 MHz, 23 °C, D<sub>6</sub>-DMSO) δ 183.7 (Cq, CO), 149.6, 148.2, 140.8, 138.4, 132.6, 128.6, 125.5 and 106.7 (Cq), 131.8, 130.0, 129.7, 129.5, 128.0, 127.4, 120.7, 120.3 and 112.8 (aromatic CH). HRMS (EI) calcd for C<sub>23</sub>H<sub>14</sub>BrNOS [M+H]<sup>+</sup>: 432.0058; Found: 432.0050.

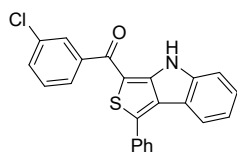

**(3-Chlorophenyl)(1-phenyl-4H-thieno[3,4-b]indol-3-yl)methanone (2i)**

This compound was prepared according to general procedure and purified by flash chromatography on silica gel (hexane/AcOEt, 10:1) to provide the corresponding product yellow solid, 57 mg, yield 74%, m.p.: 203-204 °C. <sup>1</sup>H NMR (700 MHz, 23 °C, D<sub>6</sub>-DMSO) δ 11.73 (br, 1 H, NH), 7.91 and 7.72 (m each, 5:1 H, aromatic CH), 7.61 (t, *J* = 7.7 Hz, 3 H, aromatic CH), 7.55 (dd, *J* = 7.7 and 5.4 Hz, 2 H, aromatic CH), 7.41 (t, *J* = 7.6 Hz, 1 H, aromatic CH), 7.13 (t, *J* = 7.5 Hz, 1 H, aromatic CH). <sup>13</sup>C{<sup>1</sup>H} (176 MHz, 23 °C, D<sub>6</sub>-DMSO) δ 183.2 (Cq, CO), 149.8, 148.2, 141.4, 141.1, 133.6, 132.5, 128.7, 118.1 and 106.6 (Cq), 131.5, 130.7, 129.8, 129.5, 128.1, 127.6, 127.4, 126.6, 120.7, 120.3 and 112.8 (aromatic CH). HRMS (EI) calcd for C<sub>23</sub>H<sub>14</sub>ClNOS [M+H]<sup>+</sup>: 388.0563; Found: 388.0561.

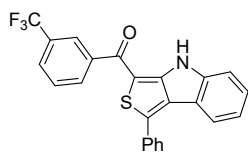

**(2-Phenyl-4H-thieno[3,2-b]indol-3-yl)(4-(trifluoromethyl)phenyl)methanone (2j)**

This compound was prepared according to general procedure and purified by flash chromatography on silica gel (hexane/AcOEt, 10:1) to provide the corresponding product yellow solid, 56 mg, yield 66%, m.p.: 243-244 °C. <sup>1</sup>H NMR (400 MHz, 23 °C, DMSO) δ 11.74 (br, 1 H, NH), 8.26 (d, *J* = 7.7 Hz, 1 H, aromatic CH), 8.19 (s, 1 H, aromatic CH), 8.00 (d, *J* = 7.8 Hz, 1 H, aromatic CH), 7.80 (m, 4 H, aromatic CH), 7.60 (t, *J* = 7.4 Hz, 2 H, aromatic CH), 7.55 (dd, *J* = 11.2 and 5.3 Hz, 2 H, aromatic CH), 7.41 (t, *J* = 7.6 Hz, 1 H, aromatic CH), 7.13 (t, *J* = 7.5 Hz, 1 H, aromatic CH). <sup>13</sup>C{<sup>1</sup>H} (176 MHz, 23 °C, D<sub>6</sub>-DMSO) δ 183.4 (Cq, CO), 149.9, 148.3, 141.4, 140.4, 132.6, 129.7 (Cq and q, *J* = 32.3 Hz), 128.9, 118.2, 106.7, 132.0, 130.2, 129.9, 129.7, 128.3 (q, *J* = 3.4 Hz), 128.2, 127.5, 124.5 (q, *J* = 3.5 Hz), δ 124.0 (Cq and q, *J* = 272.5 Hz, CF<sub>3</sub>), 120.9, 120.5 and 112.9 (aromatic CH). HRMS (EI) calcd for C<sub>24</sub>H<sub>14</sub>F<sub>3</sub>NOS [M+H]<sup>+</sup>: 422.0826; Found: 422.0829.

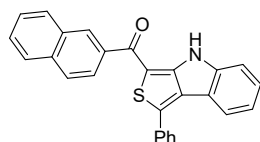

### Naphthalen-2-yl(1-phenyl-4*H*-thieno[3,4-*b*]indol-3-yl)methanone (2k)

This compound was prepared according to general procedure and purified by flash chromatography on silica gel (hexane/AcOEt, 10:1) to provide the corresponding product yellow solid, 60 mg, yield 75%, m.p.: 255-256 °C. <sup>1</sup>H NMR (400 MHz, 23 °C, D<sub>6</sub>-DMSO) δ 11.71 (br, 1 H, NH), 8.64 (s, 1 H, aromatic CH), 8.17 (d, *J* = 7.7 Hz, 1 H, aromatic CH), 8.11 (d, *J* = 8.6 Hz, 1 H, aromatic CH), 8.04 (d, *J* = 7.8 Hz, 1 H, aromatic CH), 8.00 and 7.65 (m each, 1:4 H, aromatic CH), 7.91 (t, *J* = 7.2 Hz, 3 H, aromatic CH), 7.56 (dd, *J* = 10.0 and 5.0 Hz, 2 H, aromatic CH), 7.42 (dd, *J* = 11.3 and 4.1 Hz, 1 H, aromatic CH), 7.14 (t, *J* = 7.6 Hz, 1 H, aromatic CH). <sup>13</sup>C{<sup>1</sup>H} (176 MHz, 23 °C, D<sub>6</sub>-DMSO) δ 184.9 (Cq, CO), 149.5, 148.2, 140.7, 136.8, 134.3, 132.7, 132.1, 128.7, 118.1 and 107.3 (Cq), 129.7, 129.5, 129.2, 128.6, 128.5, 128.1, 127.7, 127.3, 126.9, 124.6, 120.7, 120.2 and 112.7 (aromatic CH). HRMS (EI) calcd for C<sub>27</sub>H<sub>17</sub>NOS [M+H]<sup>+</sup>: 404.1109; Found: 404.1107.

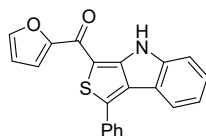

### Furan-2-yl(1-phenyl-4*H*-thieno[3,4-*b*]indol-3-yl)methanone (2l)

This compound was prepared according to general procedure and purified by flash chromatography on silica gel (hexane/AcOEt, 10:1) to provide the corresponding product yellow solid, 51 mg, yield 74%, m.p.: 259-260 °C. <sup>1</sup>H NMR (700 MHz, 23 °C, D<sub>6</sub>-DMSO) δ 11.63 (br, 1 H, NH), 8.11 (s, 1 H, aromatic CH), 7.93 (d, *J* = 7.4 Hz, 2 H, aromatic CH), 7.90 (d, *J* = 7.8 Hz, 1 H, aromatic CH), 7.65 (t, *J* = 7.6 Hz, 2 H, aromatic CH), 7.57 (dd, *J* = 13.1 and 7.6 Hz, 2 H, aromatic CH), 7.48 (d, *J* = 3.3 Hz, 1 H, aromatic CH), 7.41 (t, *J* = 7.6 Hz, 1 H, aromatic CH), 7.13 (t, *J* = 7.4 Hz, 1 H, aromatic CH), 6.82 (d, *J* = 1.8 Hz, 1 H, aromatic CH). <sup>13</sup>C{<sup>1</sup>H} (176 MHz, 23 °C, D<sub>6</sub>-DMSO) δ 171.1 (Cq, CO), 152.1, 150.4, 148.1, 147.1, 140.8, 132.8, 118.1 and 105.3 (Cq), 129.7, 129.6, 128.1, 127.9, 127.3, 120.7, 120.3, 116.8, 112.9 and 112.8 (aromatic CH). HRMS (EI) calcd for C<sub>21</sub>H<sub>13</sub>NO<sub>2</sub>S [M+H]<sup>+</sup>: 344.0745; Found: 344.0746.

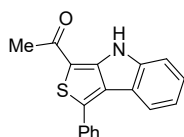

### 1-(1-Phenyl-4*H*-thieno[3,4-*b*]indol-3-yl)ethanone (2m)

This compound was prepared according to general procedure and purified by flash chromatography on silica gel (hexane/AcOEt, 10:1) to provide the corresponding product yellow solid, 36 mg, yield 61%, m.p.: 110-111 °C. <sup>1</sup>H NMR (700 MHz, 23 °C, D<sub>6</sub>-DMSO) δ 11.37 (br, 1 H, NH), 7.84 (m, 3 H, aromatic CH), 7.61 (t, *J* = 7.6 Hz, 2 H, aromatic CH), 7.53 (t, *J* = 7.4 Hz, 1 H, aromatic CH), 7.48 (d, *J* = 8.0 Hz, 1 H, aromatic CH), 7.38 (t, *J* = 7.6 Hz, 1 H, aromatic CH), 7.09 (t, *J* = 7.4 Hz, 1 H, aromatic CH), 2.54 (s, 3 H, CH<sub>3</sub>). <sup>13</sup>C{<sup>1</sup>H} (176 MHz, 23 °C, D<sub>6</sub>-DMSO) δ 187.9 (Cq, CO), 148.4, 146.9, 138.4, 129.3, 132.9, 118.5 (Cq), 129.6, 129.5, 128.1, 127.3, 120.7, 120.1 and 112.5 (aromatic CH), 28.3 (CH<sub>3</sub>). HRMS (EI) calcd for C<sub>18</sub>H<sub>13</sub>NOS [M+H]<sup>+</sup>: 292.0796; Found: 292.0793.

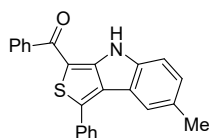

**(7-Methyl-1-phenyl-4H-thieno[3,4-b]indol-3-yl)(phenyl)methanone (2n)**

This compound was prepared according to general procedure and purified by flash chromatography on silica gel (hexane/AcOEt, 10:1) to provide the corresponding product yellow solid, 51 mg, yield 70%, m.p.:166-167 °C. <sup>1</sup>H NMR (700 MHz, 23 °C, D<sub>6</sub>-DMSO) δ 11.57 (br, 1 H, NH), 7.97, 7.88 and 7.64 (m, 2:2:3 H, aromatic CH), 7.68 (s, 1 H, aromatic CH), 7.59 (t, *J* = 7.5 Hz, 2 H, aromatic CH), 7.56 (t, *J* = 7.4 Hz, 1 H, aromatic CH), 7.44 (d, *J* = 8.2 Hz, 1 H, aromatic CH), 7.24 (d, *J* = 8.2 Hz, 1 H, aromatic CH), 2.38 (s, 3 H, CH<sub>3</sub>). <sup>13</sup>C{<sup>1</sup>H} (176 MHz, 23 °C, D<sub>6</sub>-DMSO) δ 184.9 (C<sub>q</sub>, CO), 149.9, 146.3, 140.4, 139.6, 132.7, 131.7, 128.4, 118.2 and 106.6 (C<sub>q</sub>), 129.6, 129.5, 128.9, 128.7, 128.4, 128.1, 127.9, 120.7, 112.5 (aromatic CH), 21.1 (CH<sub>3</sub>). HRMS (EI) calcd for C<sub>24</sub>H<sub>17</sub>NOS [M+H]<sup>+</sup>: 368.1109; Found: 368.1104.

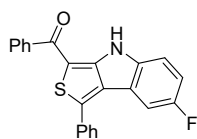

**(7-Fluoro-1-phenyl-4H-thieno[3,4-b]indol-3-yl)(phenyl)methanone (2o)**

This compound was prepared according to general procedure and purified by flash chromatography on silica gel (hexane/AcOEt, 10:1) to provide the corresponding product yellow solid, 55 mg, yield 74%, m.p.: 173-174 °C. <sup>1</sup>H NMR (700 MHz, 23 °C, D<sub>6</sub>-DMSO) δ 11.72 (br, 1 H, NH), 7.98, 7.64 and 7.55 (m, 2:3:3 H, aromatic CH), 7.86 (d, *J* = 7.2 Hz, 2 H, aromatic CH), 7.59 (t, *J* = 7.6 Hz, 2 H, aromatic CH), 7.29 (td, *J* = 9.1 and 2.5 Hz, 1 H, aromatic CH). <sup>13</sup>C{<sup>1</sup>H}(176 MHz, 23 °C, D<sub>6</sub>-DMSO) δ 184.8 (C<sub>q</sub>, CO), 156.6 (d, *J* = 234.3 Hz, C-F), 150.3, 144.6, 141.4, 139.4, 132.3, 118.3 (d, *J* = 9.8 Hz), 107.0, 106.7 (d, *J* = 25.0 Hz, C<sub>q</sub>), 131.8, 129.8, 129.7, 128.7, 128.0, 127.9, 114.6 (d, *J* = 24.7 Hz) and 113.6 (d, *J* = 9.0 Hz, aromatic CH). HRMS (EI) calcd for C<sub>23</sub>H<sub>14</sub>FNOS [M+H]<sup>+</sup>: 372.0858; Found: 372.0857.

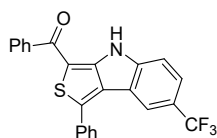

### Phenyl(1-phenyl-7-(trifluoromethyl)-4H-thieno[3,4-b]indol-3-yl)methanone (2p)

This compound was prepared according to general procedure and purified by flash chromatography on silica gel (hexane/AcOEt, 10:1) to provide the corresponding product yellow solid, 61 mg, yield 72%, m.p.: 133-134 °C. <sup>1</sup>H NMR (700 MHz, 23 °C, D<sub>6</sub>-DMSO) δ 12.10 (br, 1 H, NH), 8.09 (s, 1 H, aromatic CH), 8.00, 7.89 and 7.67 (m each, 2:2:1 H, aromatic CH), 7.77 (dd, *J* = 8.6 and 1.2 Hz, 1 H, aromatic CH), 7.72 (d, *J* = 8.5 Hz, 1 H, aromatic CH), 7.65 (d, *J* = 7.8 Hz, 2 H, aromatic CH), 7.61 (d, *J* = 7.8 Hz, 2 H, aromatic CH), 7.58 (d, *J* = 7.4 Hz, 1 H, aromatic CH). <sup>13</sup>C{<sup>1</sup>H}(176 MHz, 23 °C, D<sub>6</sub>-DMSO) δ 185.6 (Cq, CO), 150.7, 150.1, 142.1, 139.7, 132.7, 118.2 and 108.6 (Cq), 132.5, 130.6, 130.2, 129.3, 128.6, 128.5, 128.1, 125.4 (q, *J* = 271.3 Hz, CF<sub>3</sub>), 124.7 (q, *J* = 3.3 Hz), 120.9 (q, *J* = 31.6 Hz, C-CF<sub>3</sub>), 117.7 (q, *J* = 4.4 Hz), 113.8 (aromatic CH). HRMS (EI) calcd for C<sub>24</sub>H<sub>14</sub>F<sub>3</sub>NOS [M+H]<sup>+</sup>: 422.0826; Found: 422.0823.

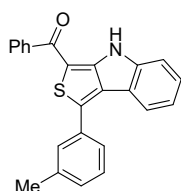

### Phenyl(1-(*m*-tolyl)-4H-thieno[3,4-b]indol-3-yl)methanone (2r)

This compound was prepared according to general procedure and purified by flash chromatography on silica gel (hexane/AcOEt, 10:1) to provide the corresponding product yellow liquid, 48 mg, yield 66%, <sup>1</sup>H NMR (400 MHz, 23 °C, D<sub>6</sub>-DMSO) δ 11.67 (br, 1 H, NH), 7.98 (m, 2 H, aromatic CH), 7.89 (d, *J* = 7.8 Hz, 1 H, aromatic CH), 7.70 (m, *J* = 11.3 Hz, 2 H, aromatic CH), 7.64 (m, 1 H, aromatic CH), 7.59 (dd, *J* = 11.4 and 4.5 Hz, 2 H, aromatic CH), 7.55 (d, *J* = 8.1 Hz, 1 H, aromatic CH), 7.51 (t, *J* = 7.6 Hz, 1 H, aromatic CH), 7.41 (t, *J* = 7.4 Hz, 1 H, aromatic CH), 7.37 (d, *J* = 7.6 Hz, 1 H, aromatic CH), 7.14 (t, *J* = 7.3 Hz, 1 H, aromatic CH), 2.43 (s, 3 H, CH<sub>3</sub>). <sup>13</sup>C{<sup>1</sup>H}(100 MHz, 23 °C, D<sub>6</sub>-DMSO) δ 185.1 (Cq, CO), 149.8, 148.3, 140.9, 139.7, 139.1, 132.7, 128.5, 118.3 and 106.9 (Cq), 131.9,

130.5, 129.5, 128.9, 128.6, 128.1, 127.4, 125.3, 120.8, 120.4 and 112.9 (aromatic CH), 21.0 (CH<sub>3</sub>). HRMS (EI) calcd for C<sub>24</sub>H<sub>17</sub>NOS [M+H]<sup>+</sup>: 368.1109; Found: 368.1108.

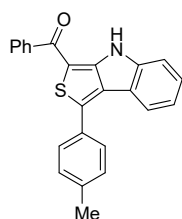

### Phenyl(1-(*p*-tolyl)-4*H*-thieno[3,4-*b*]indol-3-yl)methanone (2s)

This compound was prepared according to general procedure and purified by flash chromatography on silica gel (hexane/AcOEt, 10:1) to provide the corresponding product yellow solid, 57 mg, yield 78%, m.p.: 160-161 °C. <sup>1</sup>H NMR (700 MHz, 23 °C, D<sub>6</sub>-DMSO) δ 11.67 (br, 1 H, NH), 7.97 (d, *J* = 7.1 Hz, 2 H, aromatic CH), 7.90 (d, *J* = 7.8 Hz, 1 H, aromatic CH), 7.79 (d, *J* = 8.0 Hz, 2 H, aromatic CH), 7.65 (t, *J* = 7.4 Hz, 1 H, aromatic CH), 7.59 (t, *J* = 7.5 Hz, 2 H, aromatic CH), 7.55 (d, *J* = 8.0 Hz, 1 H, aromatic CH), 7.43 (d, *J* = 7.9 Hz, 2 H, aromatic CH), 7.40 (d, *J* = 7.4 Hz, 1 H, aromatic CH), 7.13 (t, *J* = 7.5 Hz, 1 H, aromatic CH), 2.41 (s, 3 H, CH<sub>3</sub>). <sup>13</sup>C{<sup>1</sup>H} (176 MHz, 23 °C, D<sub>6</sub>-DMSO) δ 184.9 (Cq, CO), 149.8, 148.2, 141.1, 139.7, 129.9, 118.3 and 106.6, 131.8, 130.2, 128.8, 128.4, 128.1, 128.0, 127.3, 120.8, 120.3 and 112.8 (aromatic CH), 21.1 (CH<sub>3</sub>). HRMS (EI) calcd for C<sub>24</sub>H<sub>17</sub>NOS [M+H]<sup>+</sup>: 368.1109; Found: 368.1111.

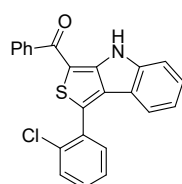

### (1-(2-Chlorophenyl)-4*H*-thieno[3,4-*b*]indol-3-yl)(phenyl)methanone (2t)

This compound was prepared according to general procedure and purified by flash chromatography on silica gel (hexane/AcOEt, 10:1) to provide the corresponding product yellow liquid, 25 mg, yield 32%. <sup>1</sup>H NMR (700 MHz, 23 °C, D<sub>6</sub>-DMSO) δ 11.67 (br, 1 H, NH), 7.96, 7.76, 7.65, 7.60, 7.38 and 7.08 (m each, 2:2:1:3:1:1 H, aromatic CH), 7.55 (td, *J* = 7.6 and 1.2 Hz, 1 H, aromatic CH), 7.53 (d, *J* = 8.1 Hz, 1 H, aromatic CH), 7.33 (d, *J* = 7.7 Hz, 1 H, aromatic CH). <sup>13</sup>C{<sup>1</sup>H} (176

MHz, 23 °C, D<sub>6</sub>-DMSO)  $\delta$  185.2 (C<sub>q</sub>, CO), 148.5, 148.2, 139.4, 135.3, 132.5, 131.6, 130.9, 118.1 and 107.8 (C<sub>q</sub>), 132.4, 131.9, 131.4, 130.4, 128.8, 127.9, 127.8, 127.3, 121.2, 120.2, 112.6 (aromatic CH). HRMS (EI) calcd for C<sub>23</sub>H<sub>14</sub>ClNOS [M+H]<sup>+</sup>: 388.0563; Found: 388.0558.

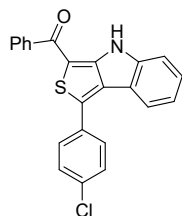

**(1-(4-Chlorophenyl)-4H-thieno[3,4-b]indol-3-yl)(phenyl)methanone (2u)**

This compound was prepared according to general procedure and purified by flash chromatography on silica gel (hexane/AcOEt, 10:1) to provide the corresponding product yellow solid, 57 mg, yield 73%, m.p.: 169-170 °C. <sup>1</sup>H NMR (700 MHz, 23 °C, D<sub>6</sub>-DMSO)  $\delta$  11.70 (br, 1 H, NH), 7.96 (d, *J* = 7.3 Hz, 2 H, aromatic CH), 7.88 and 7.66 (m each, 3:3 H, aromatic CH), 7.59 (t, *J* = 7.5 Hz, 2 H, aromatic CH), 7.55 (d, *J* = 8.1 Hz, 1 H, aromatic CH), 7.42 (t, *J* = 7.6 Hz, 1 H, aromatic CH), 7.13 (t, *J* = 7.4 Hz, 1 H aromatic CH). <sup>13</sup>C{<sup>1</sup>H} (176 MHz, 23 °C, D<sub>6</sub>-DMSO)  $\delta$  185.0 (C<sub>q</sub>, CO), 149.6, 148.3, 139.5, 138.7, 134.3, 131.5, 128.9, 117.9, 107.1 (C<sub>q</sub>), 131.8, 129.8, 129.6, 128.8, 127.9, 127.5, 120.8, 120.3, 112.8 (aromatic CH). HRMS (EI) calcd for C<sub>23</sub>H<sub>14</sub>ClNOS [M+H]<sup>+</sup>: 388.0563; Found: 388.0567.

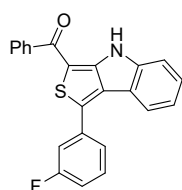

**(1-(3-Fluorophenyl)-4H-thieno[3,4-b]indol-3-yl)(phenyl)methanone (2v)**

This compound was prepared according to general procedure and purified by flash chromatography on silica gel (hexane/AcOEt, 10:1) to provide the corresponding product yellow solid, 54 mg, yield 73%, m.p.: 166-167 °C. <sup>1</sup>H NMR (700 MHz, 23 °C, D<sub>6</sub>-DMSO)  $\delta$  11.71 (br, 1 H, NH), 7.97 (m, 2 H, aromatic CH), 7.87 (d, *J* = 7.8 Hz, 1 H, aromatic CH), 7.73 (d, *J* = 8.0 Hz, 1 H, aromatic CH), 7.66, 7.43 and 7.14 (m each, 3:1:1 H, aromatic CH), 7.59 (dd, *J* = 10.4 and 4.7 Hz, 2 H,



aromatic CH), 7.56 (d,  $J = 8.1$  Hz, 1 H, aromatic CH), 7.39 (td,  $J = 8.4$  and 2.1 Hz, 1 H, aromatic CH), 7.17-7.11 (m, 1H, aromatic CH).  $^{13}\text{C}\{^1\text{H}\}$  (175 MHz, 23 °C,  $\text{D}_6\text{-DMSO}$ )  $\delta$  185.1 (Cq, CO), 162.5 (Cq and d,  $J = 245.8$  Hz, C-F), 149.5, 148.3, 139.4, 138.3 (d,  $J = 2.3$  Hz), 134.8 (d,  $J = 8.4$  Hz), 129.1, 117.9 and 107.3 (Cq), 131.8, 131.7 (d,  $J = 8.7$  Hz), 128.7, 127.9, 127.5, 124.3 (d,  $J = 2.5$  Hz), 120.8, 120.3, 116.4 (d,  $J = 21.1$  Hz), 114.7 (d,  $J = 22.8$  Hz), 112.8, 107.3 (aromatic CH). HRMS (EI) calcd for  $\text{C}_{23}\text{H}_{14}\text{FNOS}$   $[\text{M}+\text{H}]^+$ : 372.0858; Found: 372.0855.

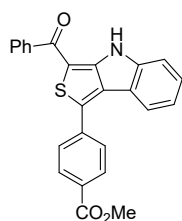

#### **Methyl 4-(3-benzoyl-4H-thieno[3,4-b]indol-1-yl)benzoate (2w)**

This compound was prepared according to general procedure and purified by flash chromatography on silica gel (hexane/AcOEt, 10:1) to provide the corresponding product yellow solid, 58 mg, yield 70%, m.p.: 176-177 °C.  $^1\text{H}$  NMR (700 MHz, 23 °C,  $\text{D}_6\text{-DMSO}$ )  $\delta$  11.72 (br, 1 H, NH), 8.12 (d,  $J = 7.8$  Hz, 2 H, aromatic CH), 7.91 and 7.56 (m each, 4:3 H, aromatic CH), 7.91 (d,  $J = 7.7$  Hz, 1 H, aromatic CH), 7.65 (t,  $J = 7.1$  Hz, 1 H, aromatic CH), 7.42 (t,  $J = 7.4$  Hz, 1 H, aromatic CH), 7.12 (t,  $J = 7.3$  Hz, 1 H, aromatic CH), 3.89 (s, 3 H,  $\text{OCH}_3$ ).  $^{13}\text{C}\{^1\text{H}\}$  (176 MHz, 23 °C,  $\text{D}_6\text{-DMSO}$ )  $\delta$  185.0 (Cq, CO), 165.6 (Cq,  $\text{CO}_2$ ), 149.5, 148.4, 139.3, 138.2, 137.2, 130.2, 129.9, 129.3, 128.7, 128.2, 127.9, 117.8 and 107.7 (Cq), 131.8, 127.6, 120.9, 120.2 and 112.8 (aromatic CH), 52.3 ( $\text{OCH}_3$ ). HRMS (EI) calcd for  $\text{C}_{25}\text{H}_{17}\text{NO}_3\text{S}$   $[\text{M}+\text{H}]^+$ : 412.1007; Found: 412.1009.

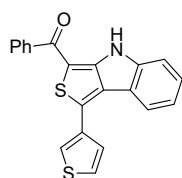

#### **Phenyl(1-(thiophen-3-yl)-4H-thieno[3,4-b]indol-3-yl)methanone (2x)**

This compound was prepared according to general procedure and purified by flash chromatography on silica gel (hexane/AcOEt, 10:1) to provide the

corresponding product yellow solid, 55 mg, yield 76%, m.p.: 174-175 °C. <sup>1</sup>H NMR (700 MHz, 23 °C, D<sub>6</sub>-DMSO) δ 11.71 (br, 1 H, NH), 8.08 and 7.88–7.38 (m each, 3:7 H, aromatic CH), 7.23 (d, *J* = 75.7 Hz, 2 H, aromatic CH). <sup>13</sup>C{<sup>1</sup>H} (176 MHz, 23 °C, D<sub>6</sub>-DMSO) δ 184.7 (Cq, CO), 149.7, 148.1, 139.5, 134.1, 132.9, 127.9, 117.8 and 105.6 (Cq), 131.7, 128.9, 128.7, 128.4, 127.8, 127.4, 121.1, 120.3 and 112.7 (aromatic CH). HRMS (EI) calcd for C<sub>21</sub>H<sub>13</sub>NOS<sub>2</sub> [M+H]<sup>+</sup>: 360.0517; Found: 360.0512.

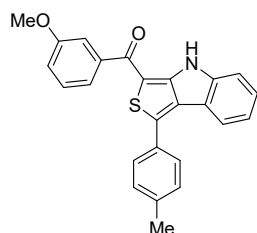

### **(3-Methoxyphenyl)(1-(p-tolyl)-4H-thieno[3,4-b]indol-3-yl)methanone (2y)**

This compound was prepared according to general procedure and purified by flash chromatography on silica gel (hexane/AcOEt, 10:1) to provide the corresponding product yellow solid, 57 mg, yield 72%, m.p.: 143-144 °C. <sup>1</sup>H NMR (700 MHz, 23 °C, D<sub>6</sub>-DMSO) δ 11.65 (br, 1 H, NH), 7.89 and 7.53 (d each, *J* = 7.8 Hz, 1:1 H, aromatic CH), 7.76 (d, *J* = 7.9 Hz, 2 H, aromatic CH), 7.55 (d, *J* = 8.2 Hz, 1 H, aromatic CH), 7.49 (t, *J* = 7.8 Hz, 1 H, aromatic CH), 7.45 (s, 1 H, aromatic CH), 7.40 (m, 3 H, aromatic CH), 7.20 (dd, *J* = 8.0 and 1.7 Hz, 1 H, aromatic CH), 7.12 (t, *J* = 7.5 Hz, 1 H, aromatic CH), 3.85 (s, 3 H, OCH<sub>3</sub>), 2.39 (s, 3 H, C-CH<sub>3</sub>). <sup>13</sup>C{<sup>1</sup>H} (176 MHz, 23 °C, D<sub>6</sub>-DMSO) δ 184.5 (Cq, CO), 159.3, 149.7, 148.1, 141.1, 141.0, 139.6, 129.8, 128.3, 118.2 and 106.6 (Cq), 130.1, 129.9, 127.9, 127.2, 120.7, 120.2, 120.1, 117.4, 113.0 and 112.7 (aromatic CH), 55.4 (OCH<sub>3</sub>), 20.9 (C-CH<sub>3</sub>). HRMS (EI) calcd for C<sub>25</sub>H<sub>19</sub>NO<sub>2</sub>S [M+H]<sup>+</sup>: 398.1215; Found: 398.1213.

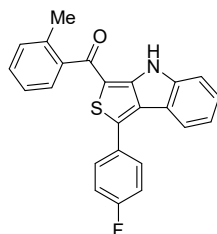

### **(1-(4-Fluorophenyl)-4H-thieno[3,4-b]indol-3-yl)(o-tolyl)methanone (2z)**

This compound was prepared according to general procedure and purified by flash chromatography on silica gel (hexane/AcOEt, 10:1) to provide the corresponding

product yellow liquid, 59 mg, yield 76%.  $^1\text{H}$  NMR (700 MHz, 23 °C,  $\text{D}_6\text{-DMSO}$ )  $\delta$  11.72 (br, 1 H, NH), 7.59 (d,  $J = 7.3$  Hz, 1 H, aromatic CH), 7.54 (d,  $J = 8.1$  Hz, 1 H, aromatic CH), 7.46–7.37 and 7.45 (m each, 4:3 H, aromatic CH), 7.35 (d,  $J = 8.0$  Hz, 1 H, aromatic CH), 7.32 (d,  $J = 7.4$  Hz, 1 H, aromatic CH), 7.11 (t,  $J = 7.4$  Hz, 1 H, aromatic CH), 2.36 (s, 3 H,  $\text{CH}_3$ ).  $^{13}\text{C}\{^1\text{H}\}$  (176 MHz, 23 °C,  $\text{D}_6\text{-DMSO}$ )  $\delta$  187.6 (Cq, CO), 163.2 (d,  $J = 248.1$  Hz, C-F), 148.9, 148.7, 140.3, 140.0, 135.6, 129.6 (d,  $J = 3.1$  Hz), 129.4, 118.5 and 109.3 (Cq), 131.3, 130.8 (d,  $J = 8.6$  Hz), 130.5, 127.8, 127.5, 125.9, 121.1, 120.7, 117.0 (d,  $J = 22.0$  Hz) and 113.2 (aromatic CH), 19.6 ( $\text{CH}_3$ ). HRMS (EI) calcd for  $\text{C}_{24}\text{H}_{16}\text{FNOS}$   $[\text{M}+\text{H}]^+$ : 386.1015; Found: 386.1013.

## 5. Copies of NMR spectra for thiophene-fused *N*-heterocycles 2

LZQE-258

PROTON DMSO {D:\NMR400\203} nmr 30

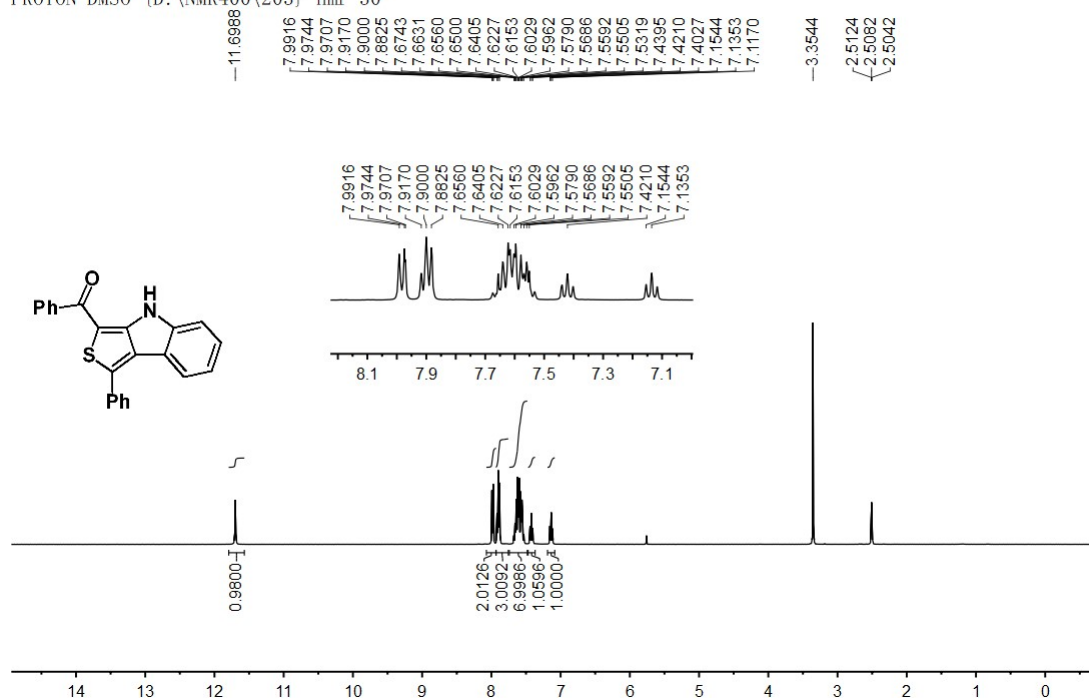

Figure S1. <sup>1</sup>H NMR spectrum of **2a** (d<sub>6</sub>-DMSO, 400 MHz).

LZQE-258

C13CPD DMSO {D:\NMR400\203} nmr 10

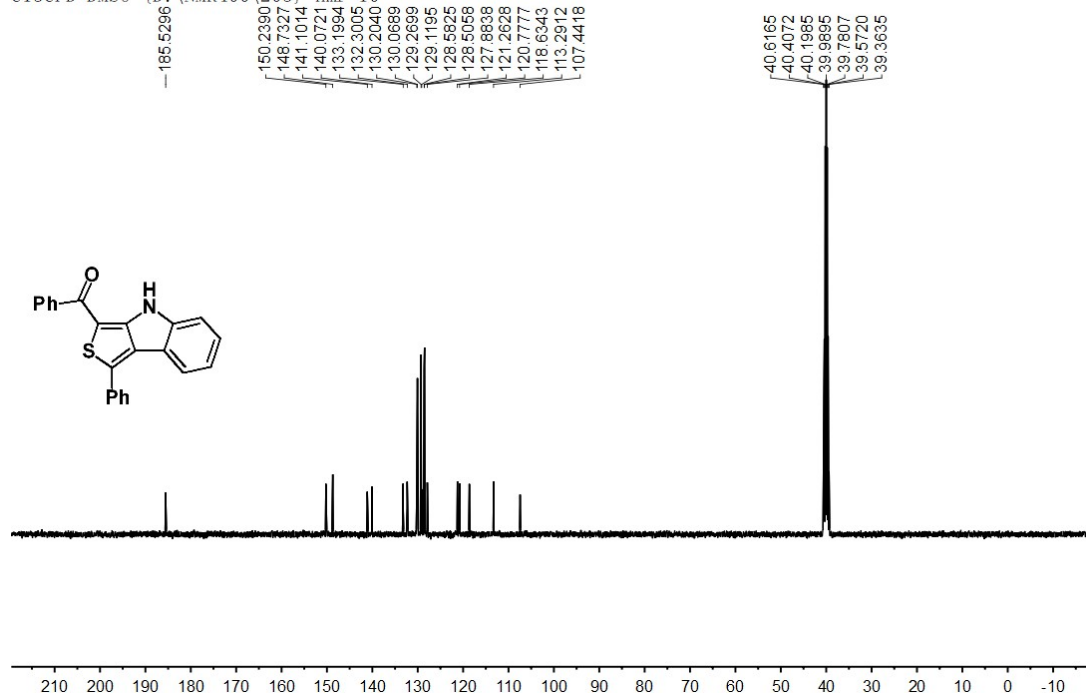

Figure S2. <sup>13</sup>C NMR spectrum of **2a** (d<sub>6</sub>-DMSO, 100 MHz).

lzqe-308

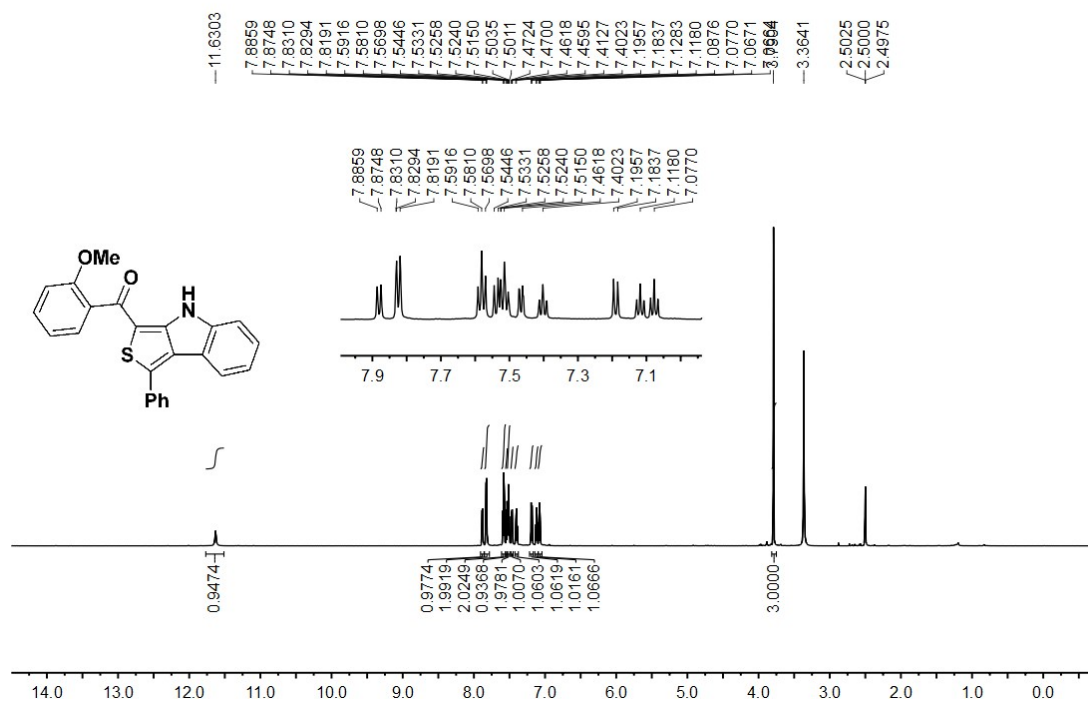

Figure S3. <sup>1</sup>H NMR spectrum of **2b** (d<sub>6</sub>-DMSO, 400 MHz).

lzqe-308

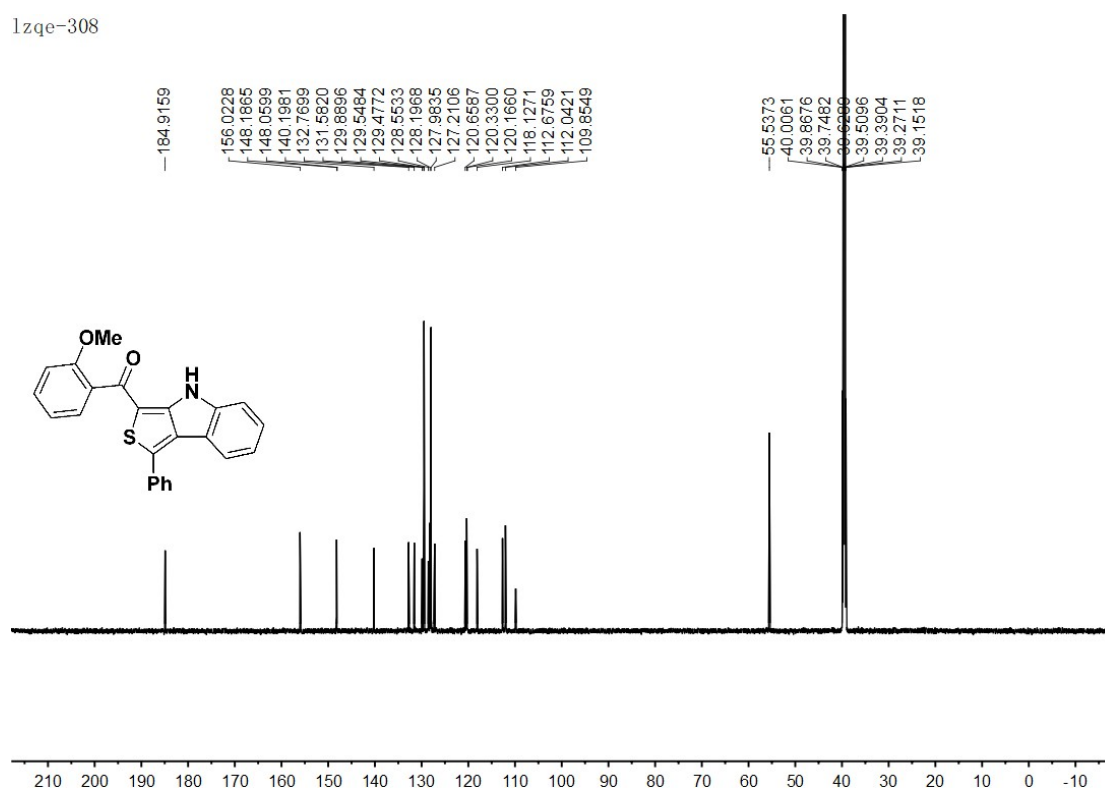

Figure S4. <sup>13</sup>C NMR spectrum of **2b** (d<sub>6</sub>-DMSO, 100 MHz).

LZQE-257

PROTON DMSO {D:\NMR400\203} nmr 14

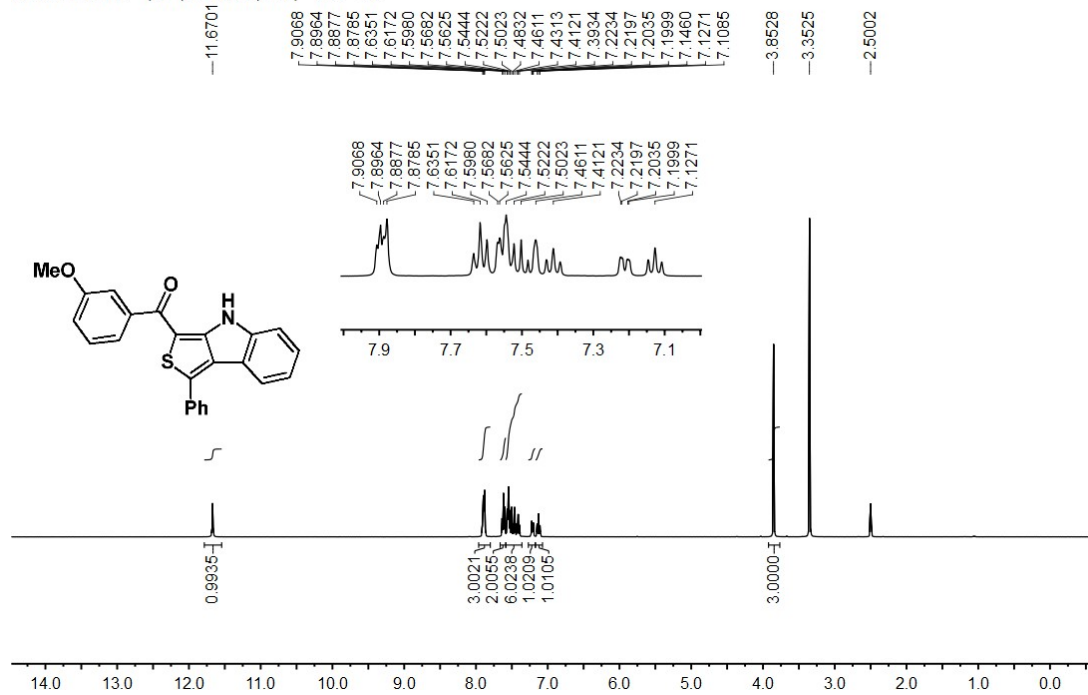

Figure S5. <sup>1</sup>H NMR spectrum of 2c (d<sub>6</sub>-DMSO, 400 MHz).

LZQE-257

C13CPD DMSO {D:\NMR400\203} nmr 14

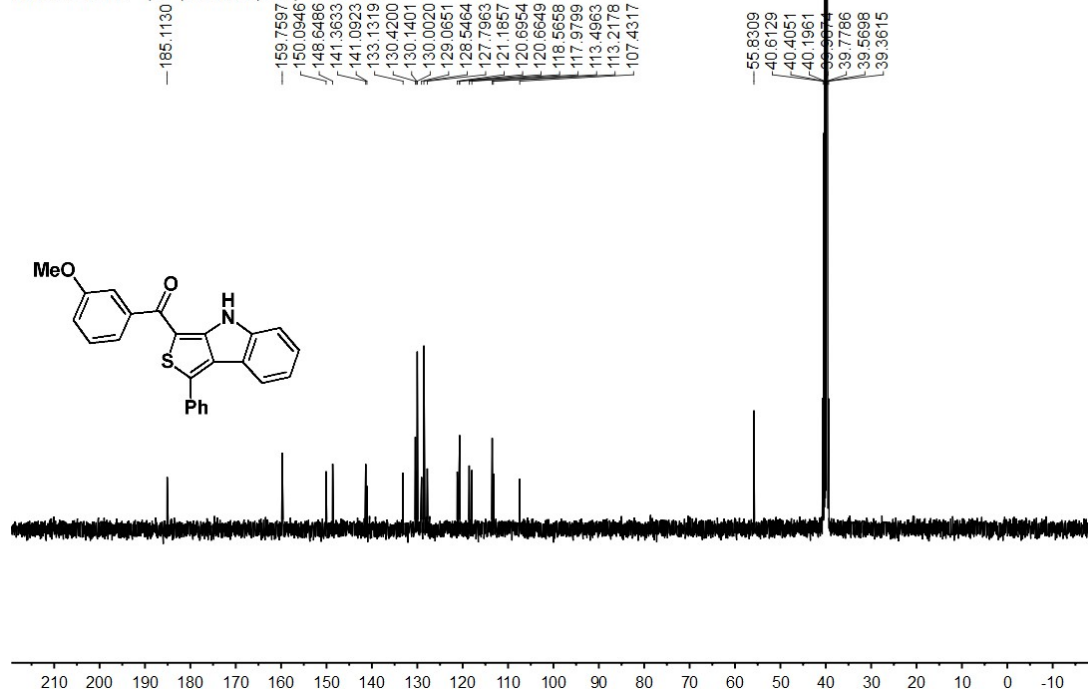

Figure S6. <sup>13</sup>C NMR spectrum of 2c (d<sub>6</sub>-DMSO, 100 MHz).

lzqe-281

PROTON DMSO {D:\700NMR\203} NMR

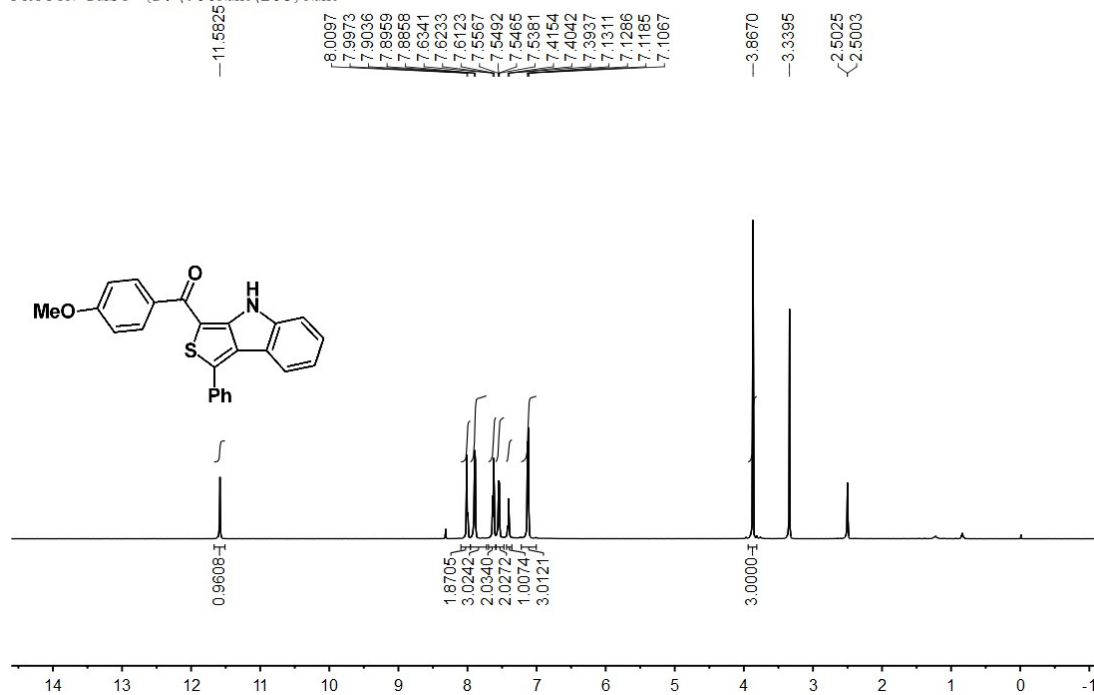

Figure S7.  $^1\text{H}$  NMR spectrum of **2d** (d<sub>6</sub>-DMSO, 400 MHz).

lzqe-281

C13CPD DMSO {D:\700NMR\203} NMR

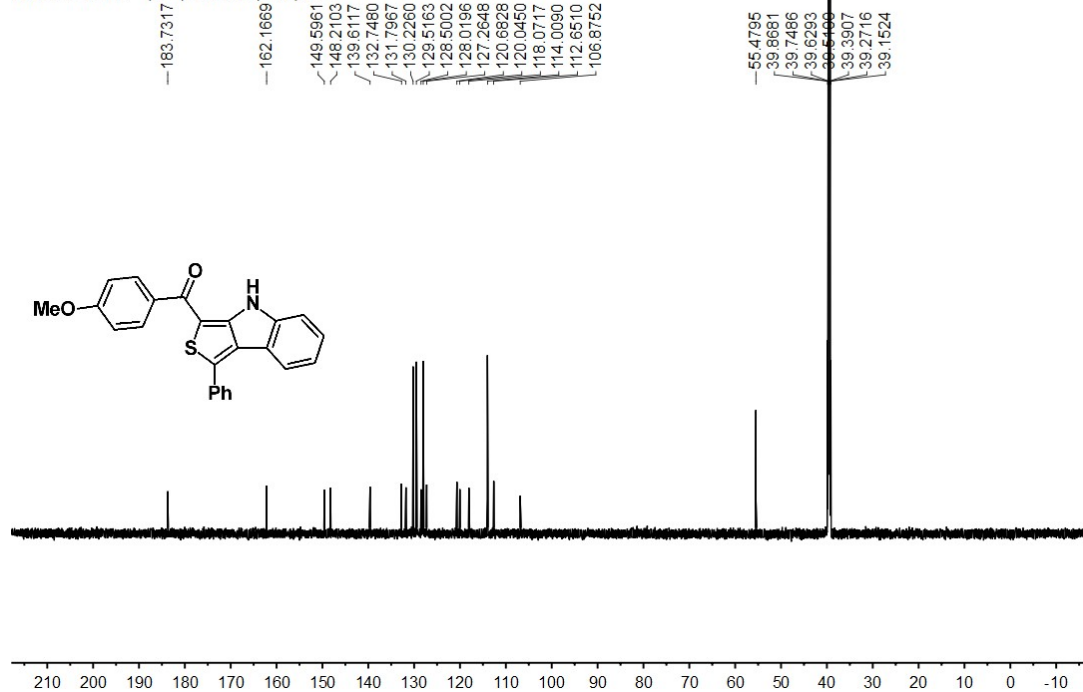

Figure S8.  $^{13}\text{C}$  NMR spectrum of **2d** (d<sub>6</sub>-DMSO, 100 MHz).

lzqe-420

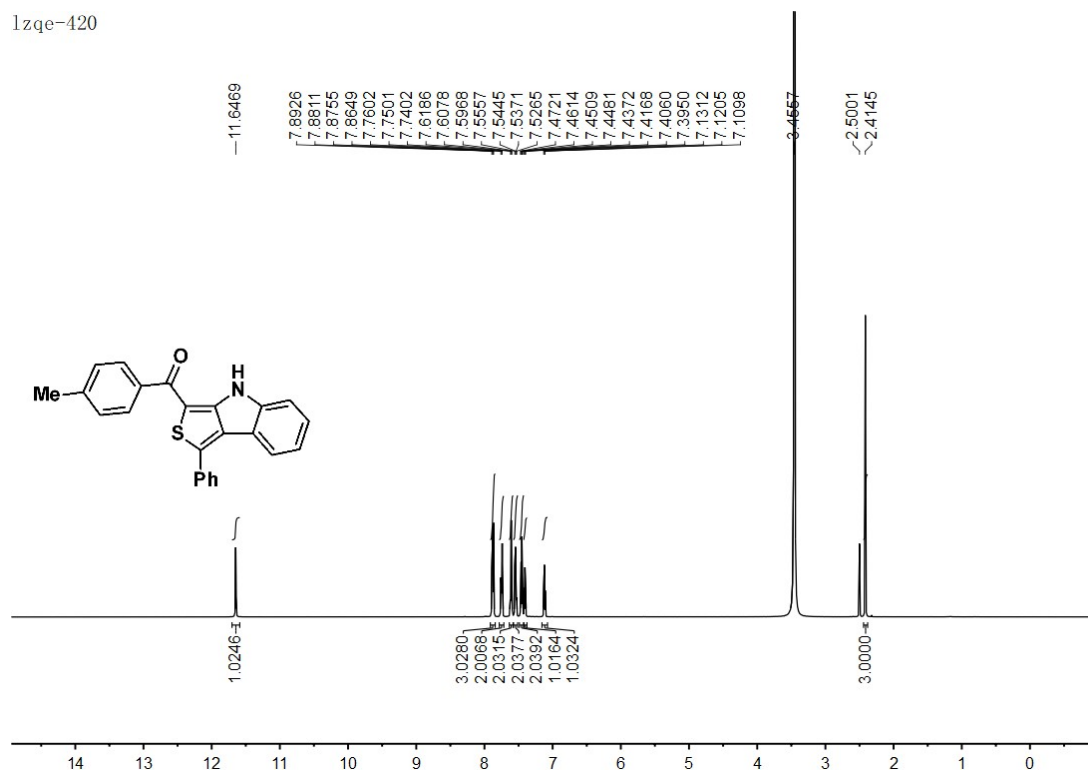

Figure S9. <sup>1</sup>H NMR spectrum of **2e** (d<sub>6</sub>-DMSO, 400 MHz).

lzqe-420

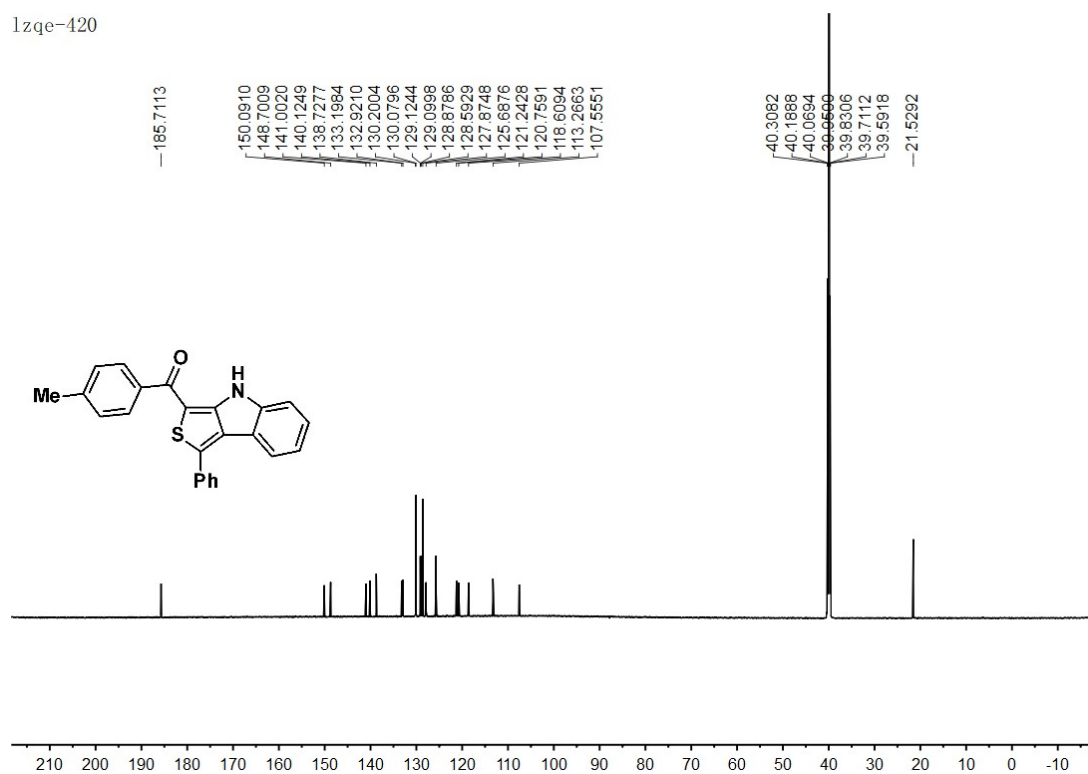

Figure S10. <sup>13</sup>C NMR spectrum of **2e** (d<sub>6</sub>-DMSO, 100 MHz).



lzqe-275

PROTON DMSO {D:\NMR400\203} nmr 47

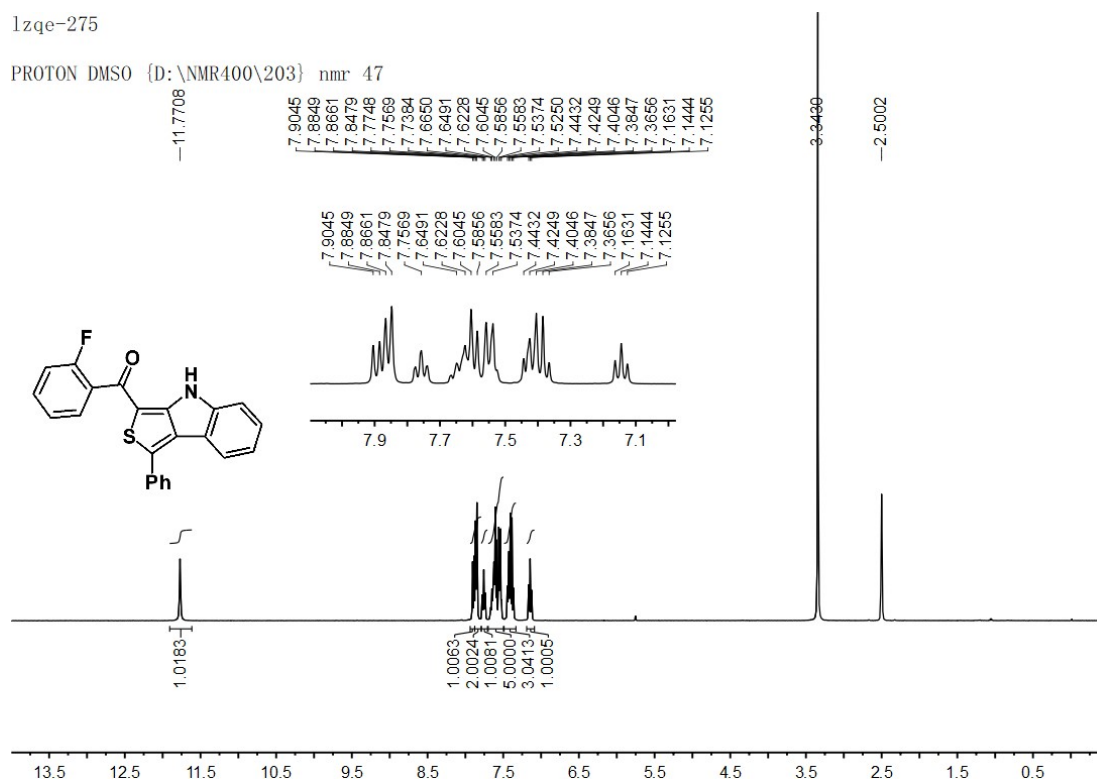

Figure S11. <sup>1</sup>H NMR spectrum of 2f (d<sub>6</sub>-DMSO, 400 MHz).

LZQE-275

C13CPD DMSO {D:\NMR700\203} NMR

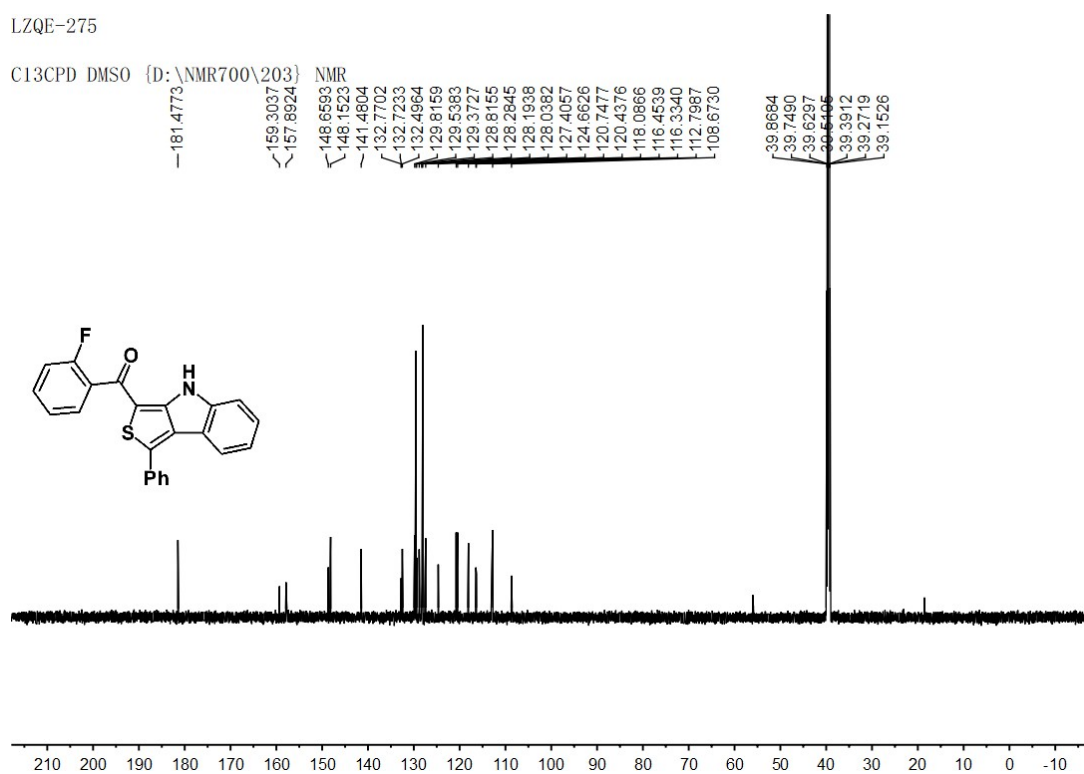

Figure S12. <sup>13</sup>C NMR spectrum of 2f (d<sub>6</sub>-DMSO, 100 MHz).

lzqe-282

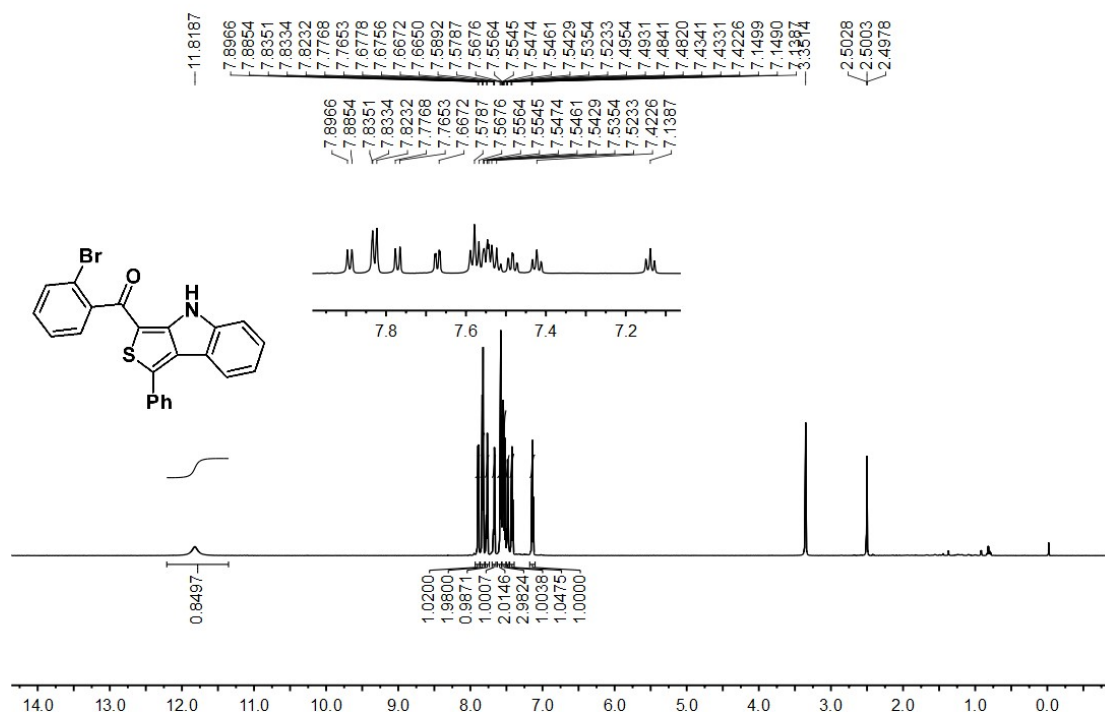

**Figure S13.**  $^1\text{H}$  NMR spectrum of **2g** ( $\text{d}_6\text{-DMSO}$ , 400 MHz).

lzqe-282

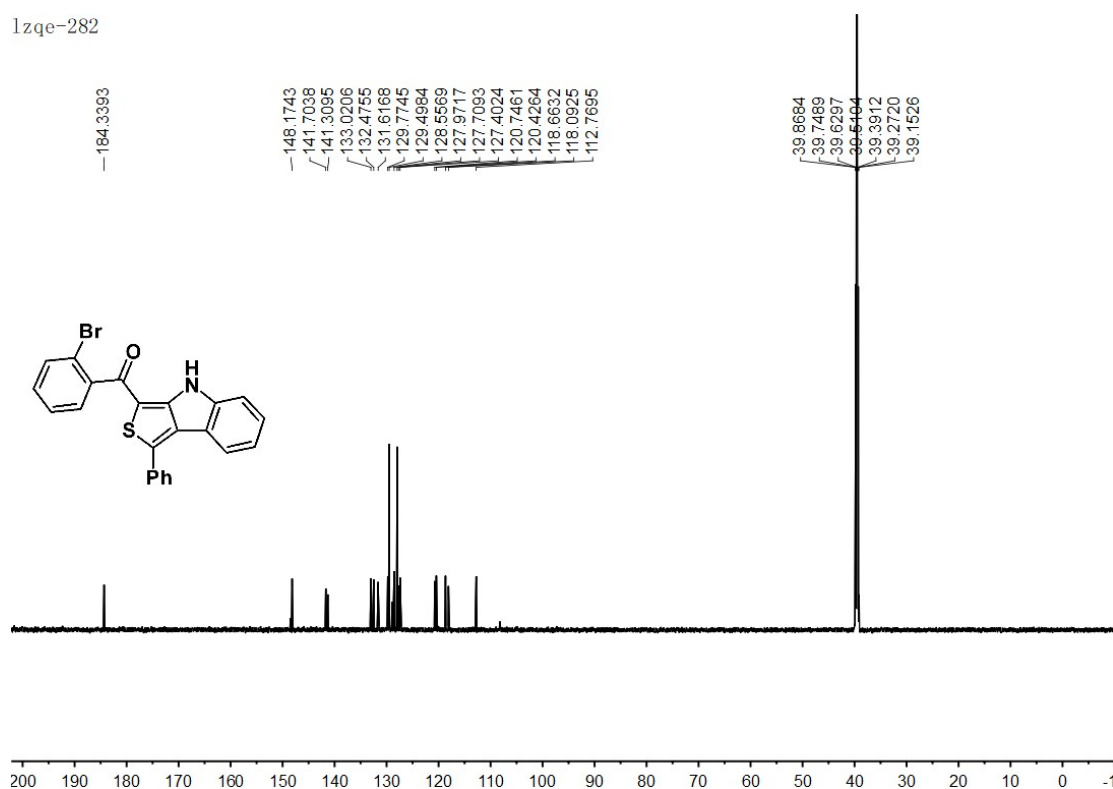

**Figure S14.**  $^{13}\text{C}$  NMR spectrum of **2g** ( $\text{d}_6\text{-DMSO}$ , 100 MHz).

lzqe-293

PROTON DMSO {D:\700NMR\203} NMR

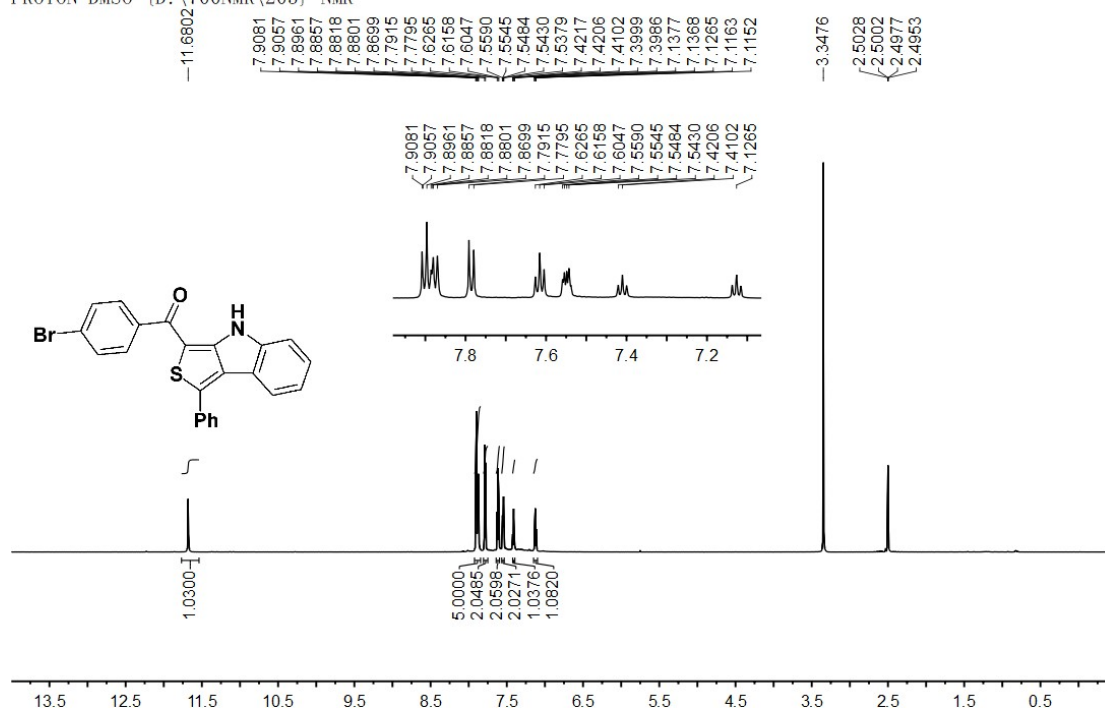

Figure S15. <sup>1</sup>H NMR spectrum of **2h** (d<sub>6</sub>-DMSO, 400 MHz).

lzqe-289

PROTON DMSO {D:\700NMR\203} NMR

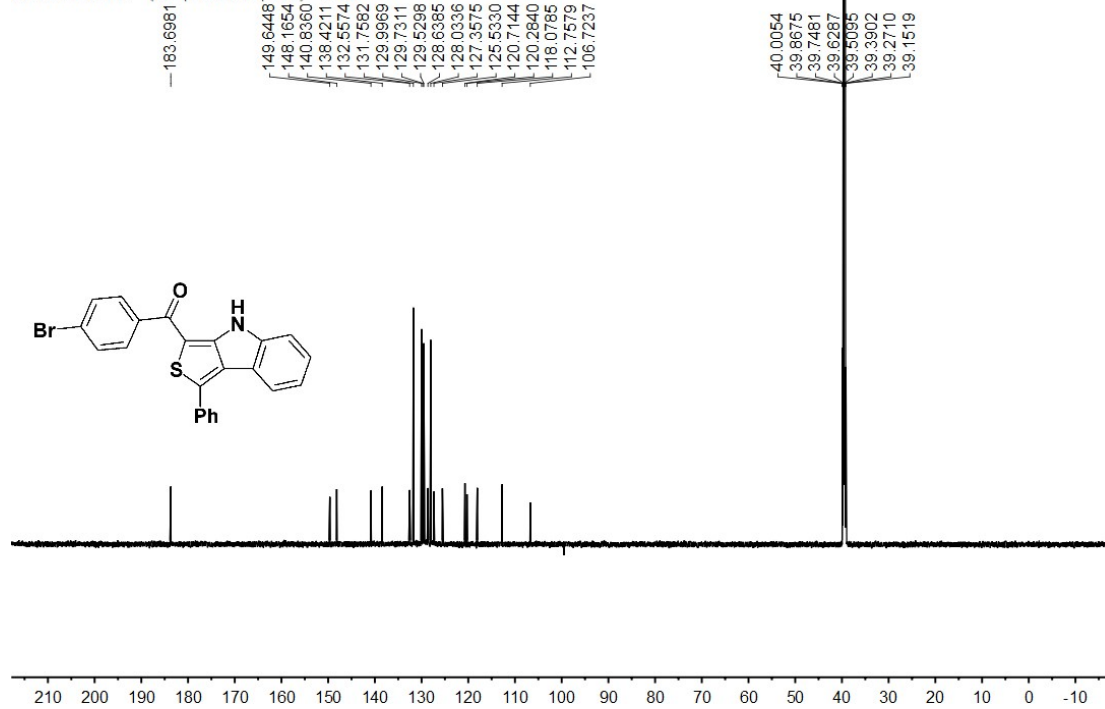

Figure S16. <sup>13</sup>C NMR spectrum of **2h** (d<sub>6</sub>-DMSO, 100 MHz).

LZQE-317

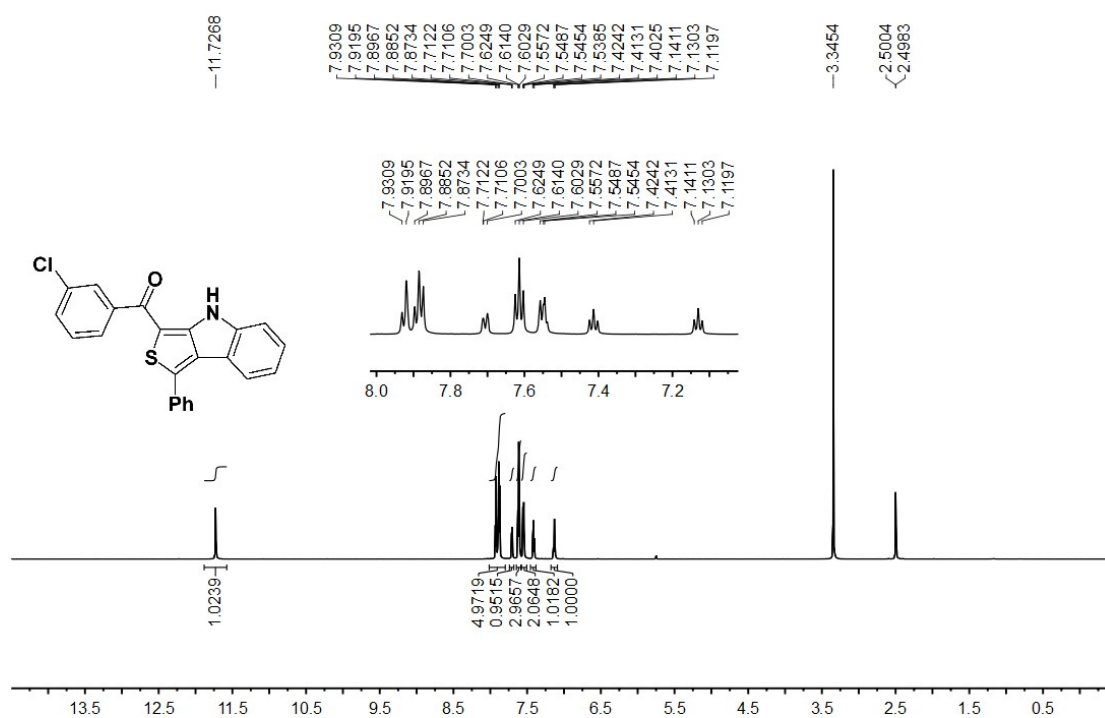

Figure S17. <sup>1</sup>H NMR spectrum of **2i** (d<sub>6</sub>-DMSO, 400 MHz).

LZQE-317

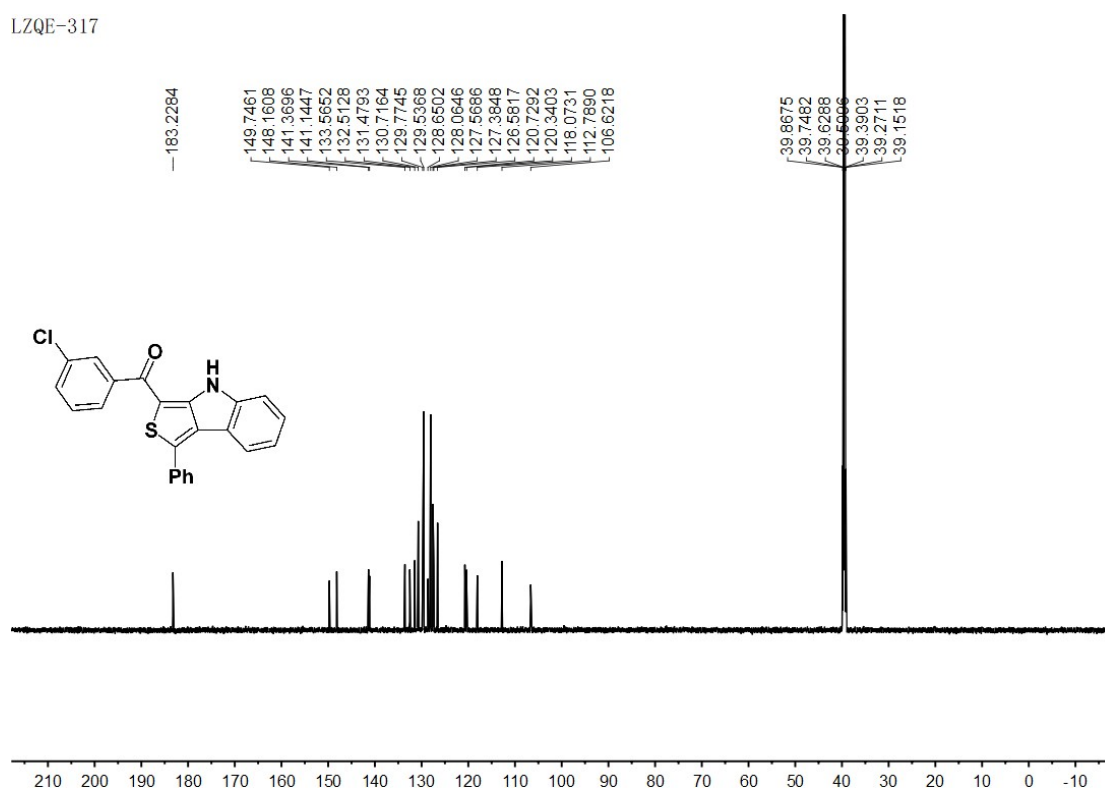

Figure S18. <sup>13</sup>C NMR spectrum of **2i** (d<sub>6</sub>-DMSO, 100 MHz).

LZQE-309

PROTON DMSO {D:\NMR400\203} nmr 44

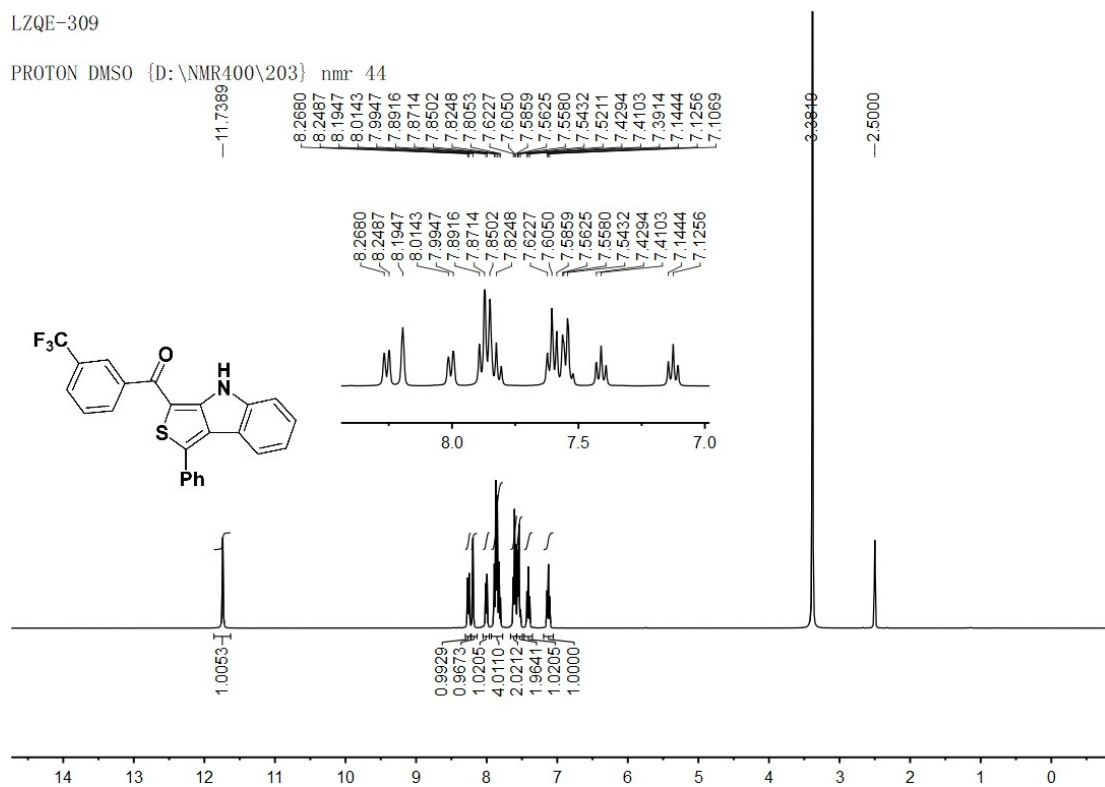

Figure S19. <sup>1</sup>H NMR spectrum of **2j** (d<sub>6</sub>-DMSO, 400 MHz).

LZQE-309

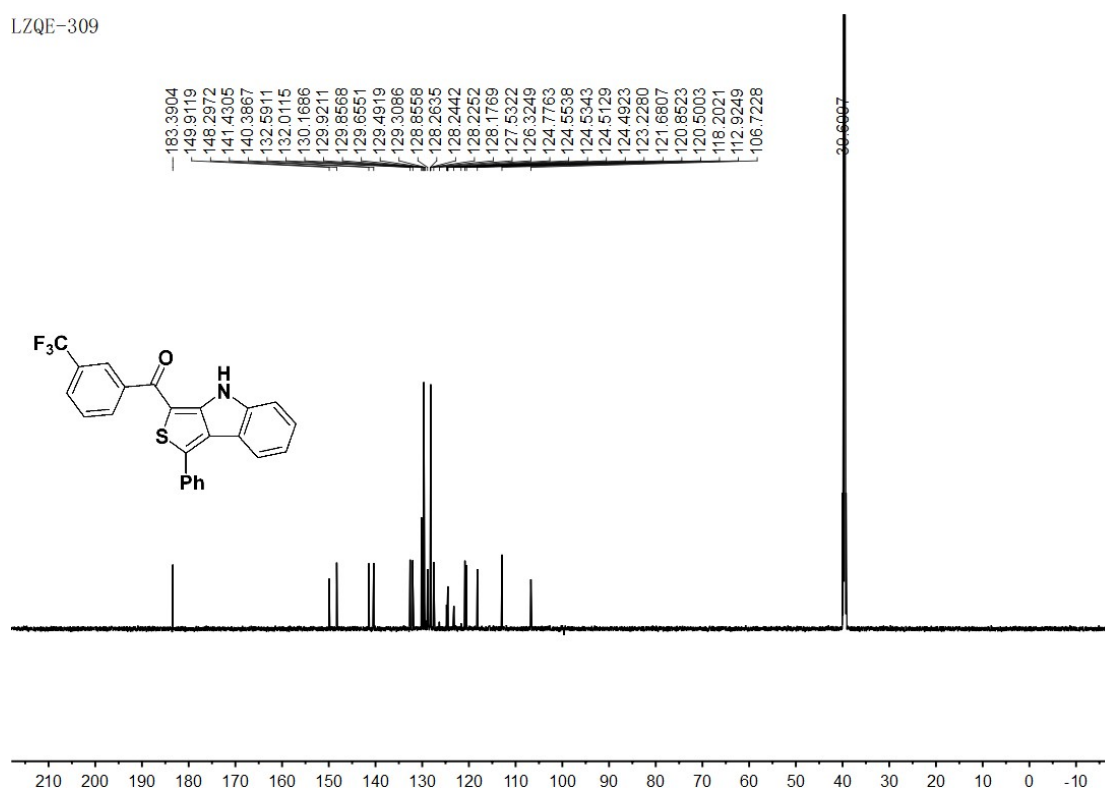

Figure S20. <sup>13</sup>C NMR spectrum of **2j** (d<sub>6</sub>-DMSO, 100 MHz).

lzqe-287

PROTON DMSO {D:\NMR400\203} nmr 46

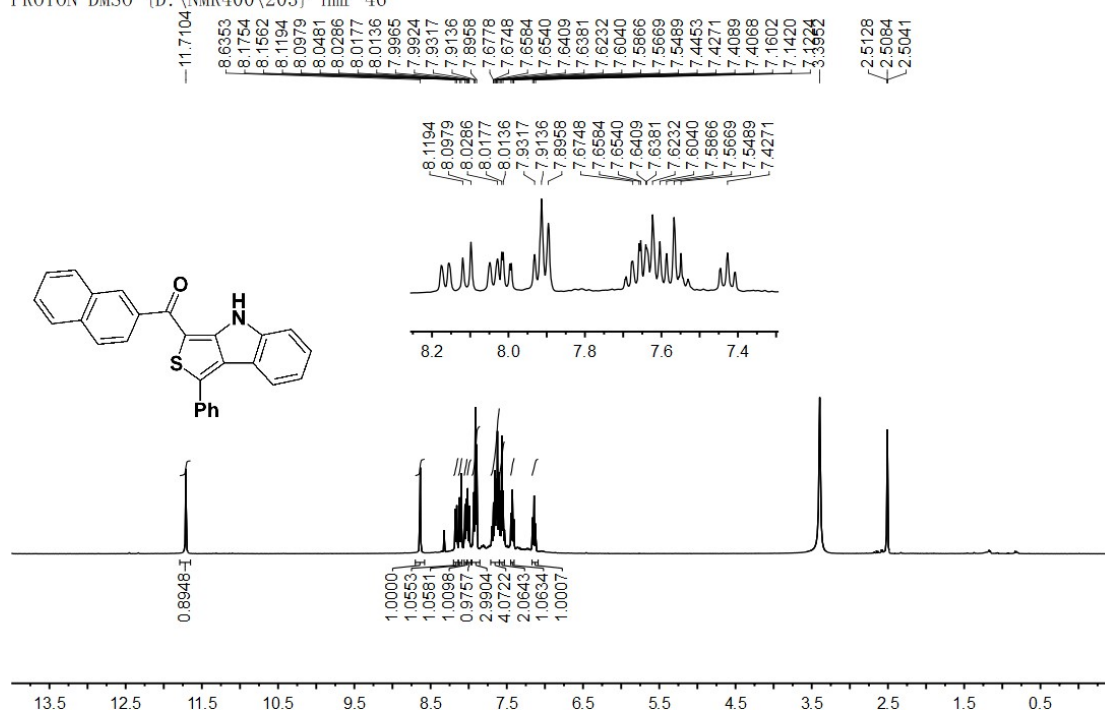

Figure S21. <sup>1</sup>H NMR spectrum of **2k** (d<sub>6</sub>-DMSO, 400 MHz).

lzqe-287

C13CPD DMSO {D:\700NMR\203} NMR

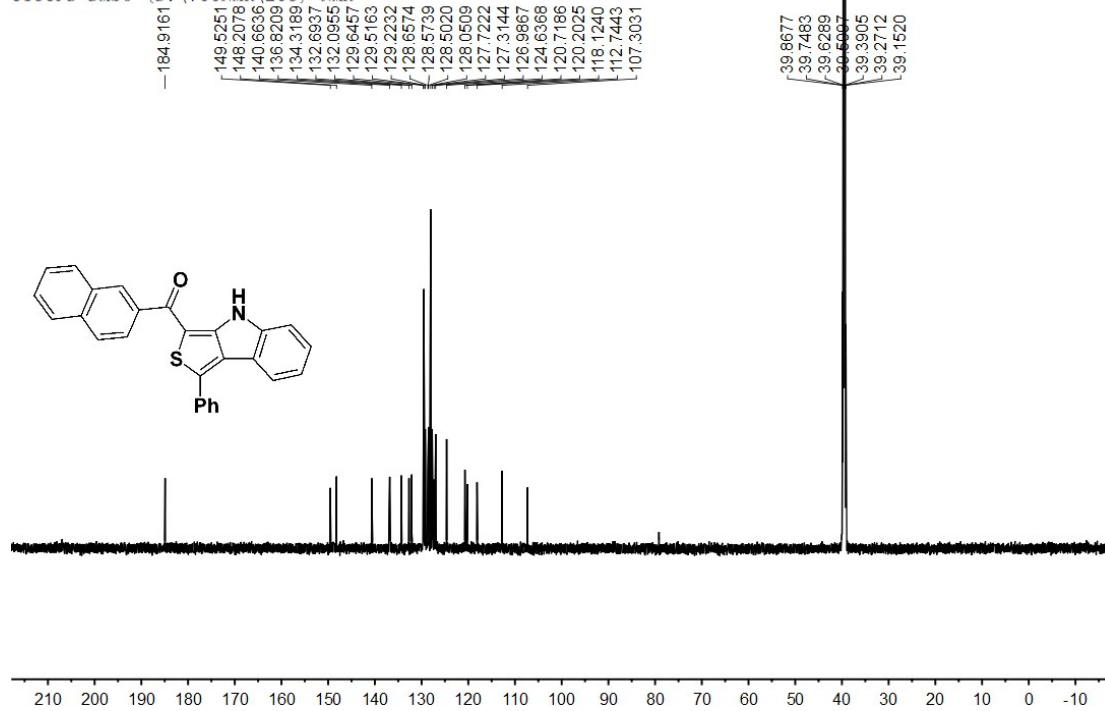

Figure S22. <sup>13</sup>C NMR spectrum of **2k** (d<sub>6</sub>-DMSO, 100 MHz).

lzqe-288

PROTON DMSO {D:\700NMR\203} NMR

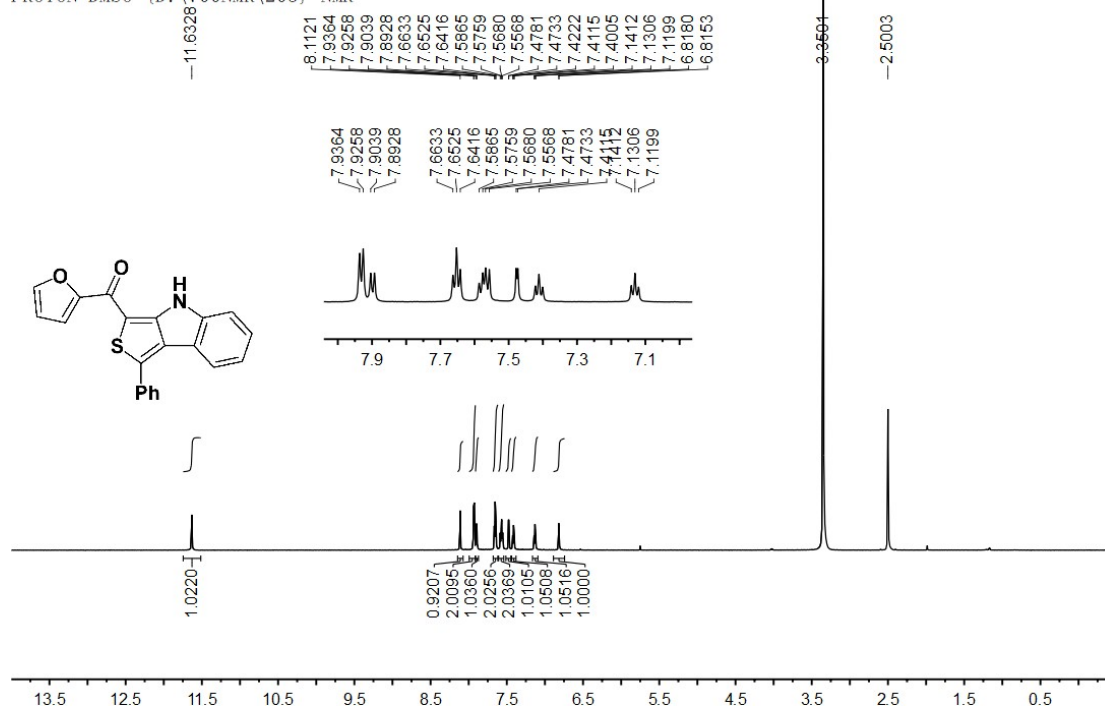

Figure S23. <sup>1</sup>H NMR spectrum of **21** (d6-DMSO, 400 MHz).

lzqe-288

C13CPD DMSO {D:\700NMR\203} NMR

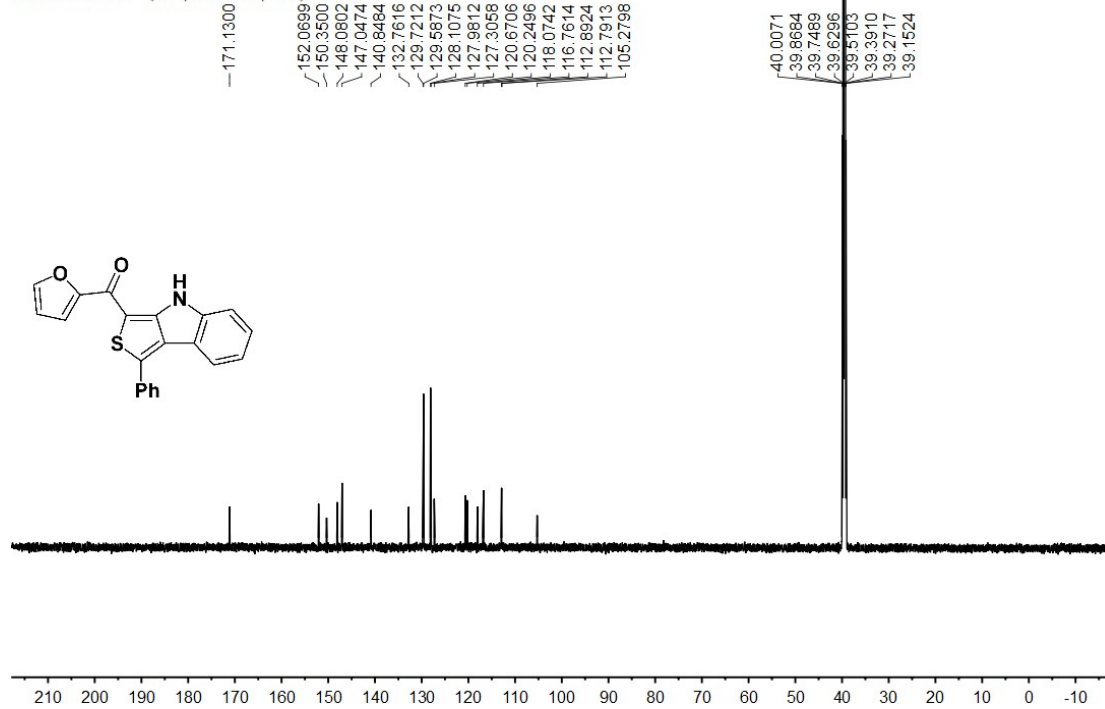

Figure S24. <sup>13</sup>C NMR spectrum of **21** (d6-DMSO, 100 MHz).



lzqe-325

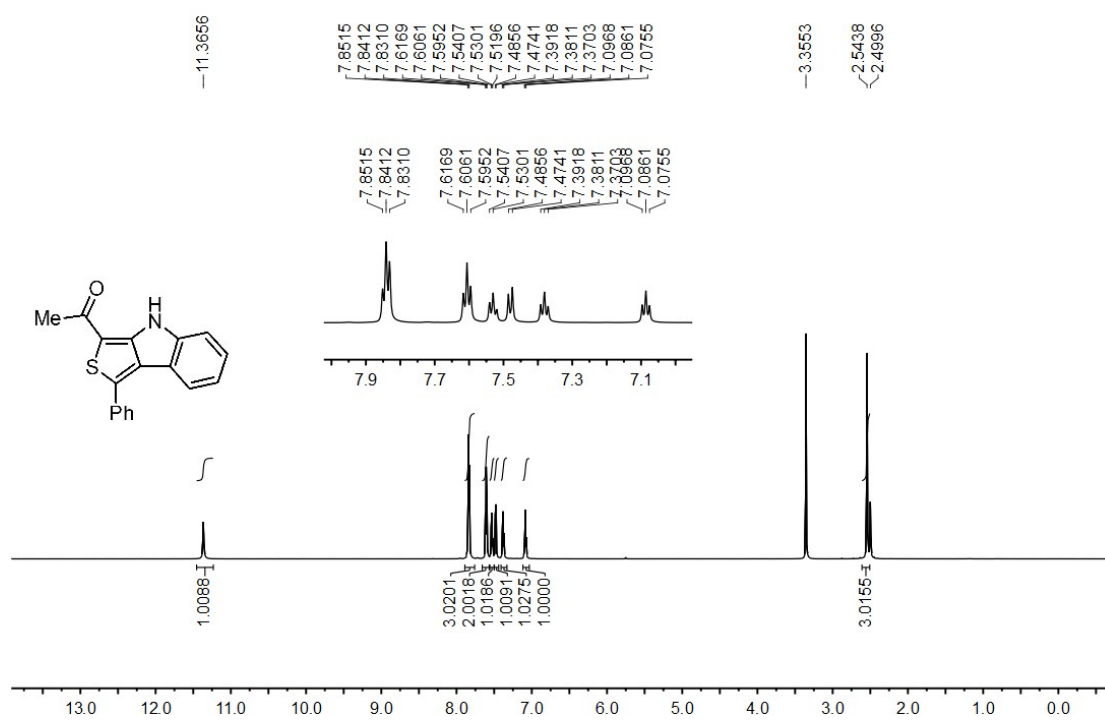

Figure S25. <sup>1</sup>H NMR spectrum of **2m** (d<sub>6</sub>-DMSO, 400 MHz).

lzqe-325

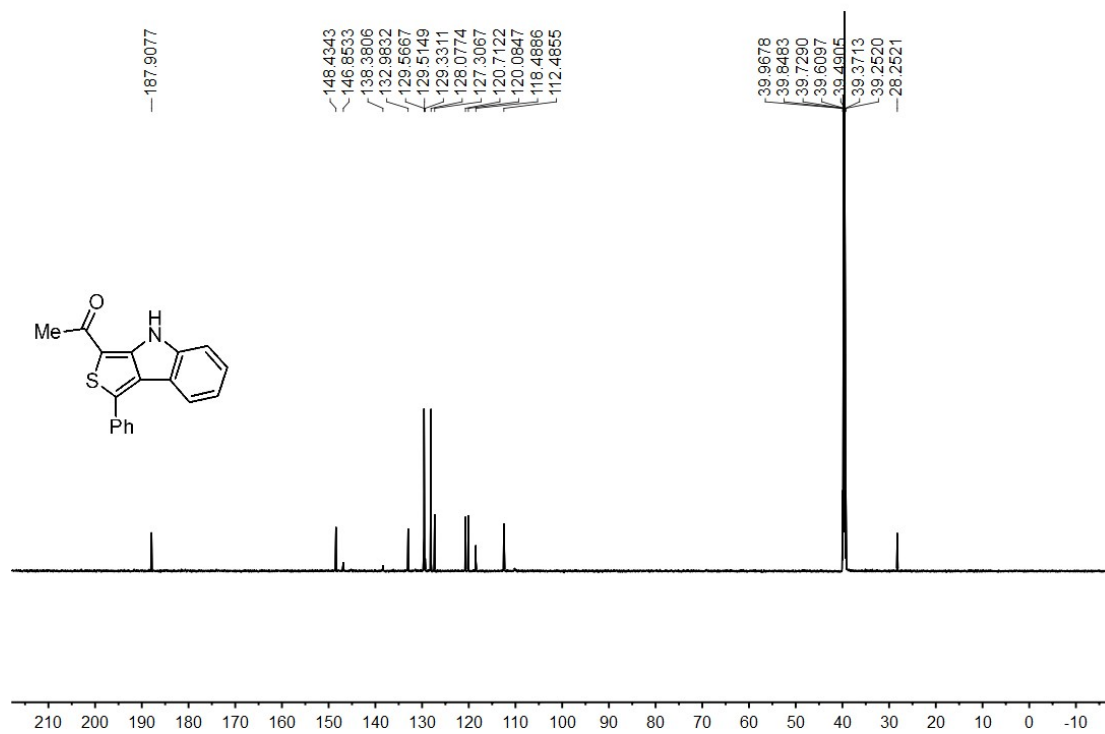

Figure S26. <sup>13</sup>C NMR spectrum of **2m** (d<sub>6</sub>-DMSO, 100 MHz).



lzqe-289

PROTON DMSO {D:\700NMR\203} NMR

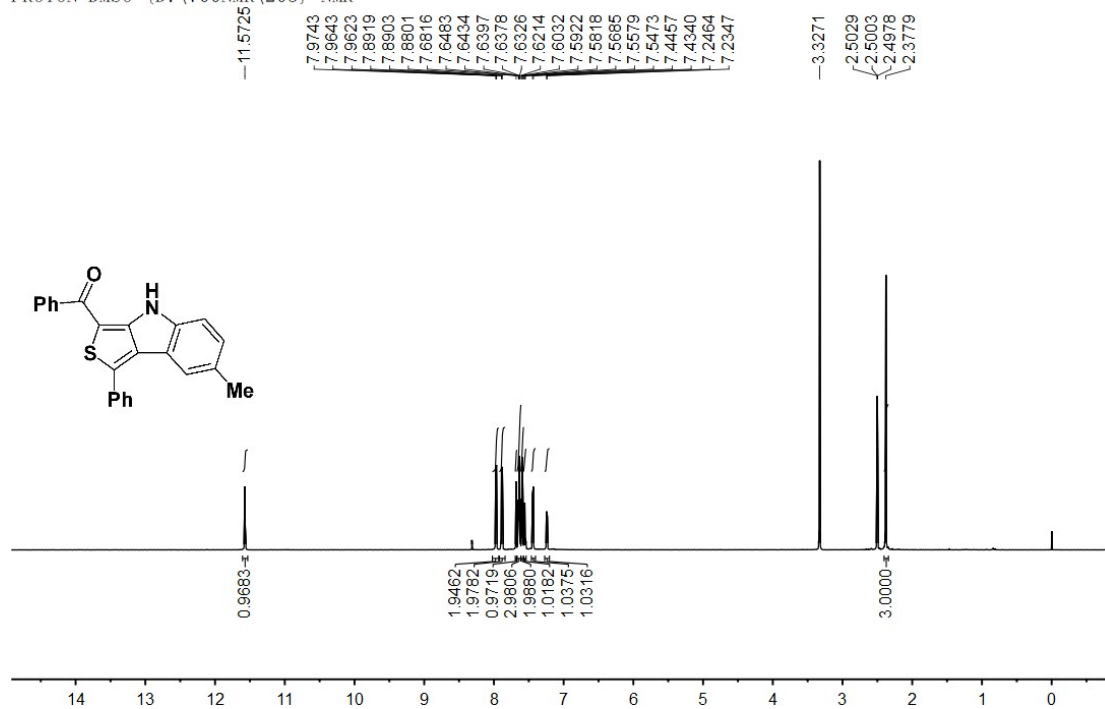

Figure S27. <sup>1</sup>H NMR spectrum of **2n** (d<sub>6</sub>-DMSO, 400 MHz).

lzqe-289

C13CPD DMSO {D:\700NMR\203} NMR

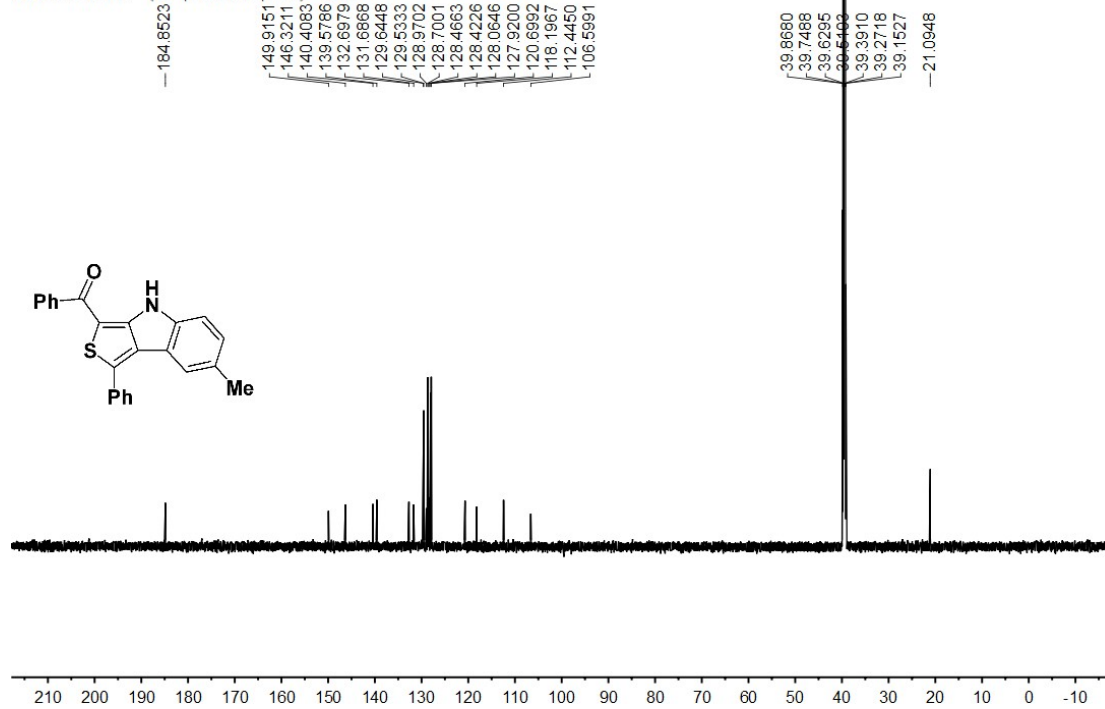

Figure S28. <sup>13</sup>C NMR spectrum of **2n** (d<sub>6</sub>-DMSO, 100 MHz).

lzqe-283

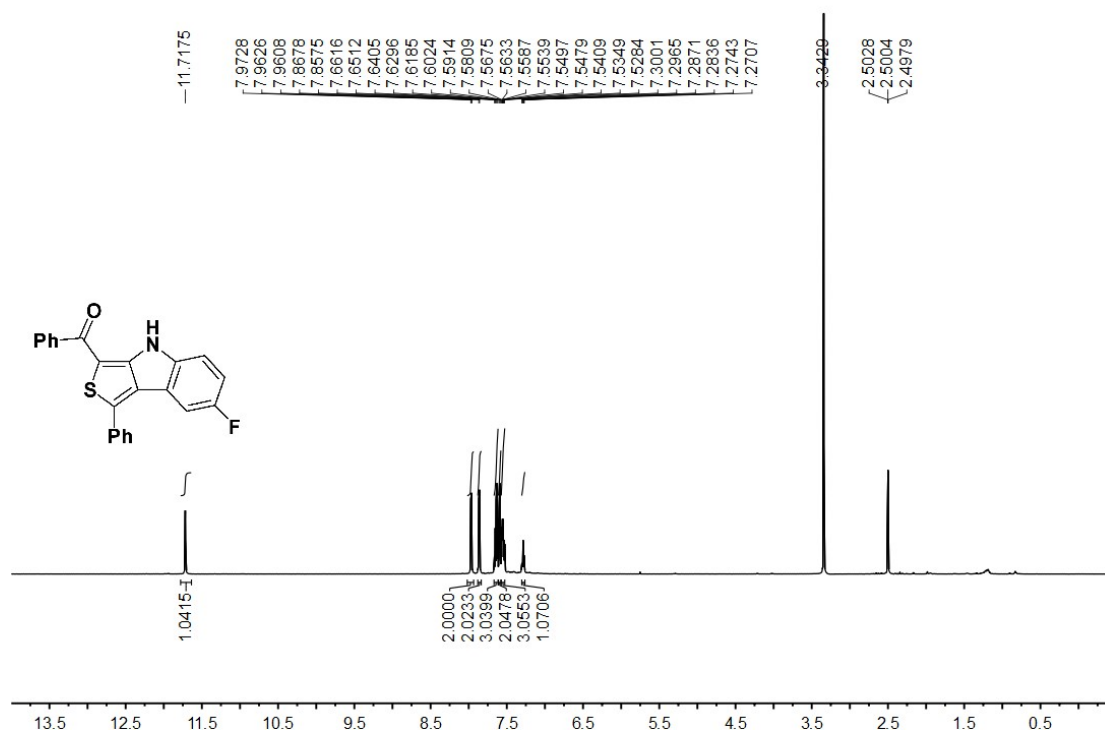

Figure S29. <sup>1</sup>H NMR spectrum of **2o** (d<sub>6</sub>-DMSO, 400 MHz).

lzqe-421

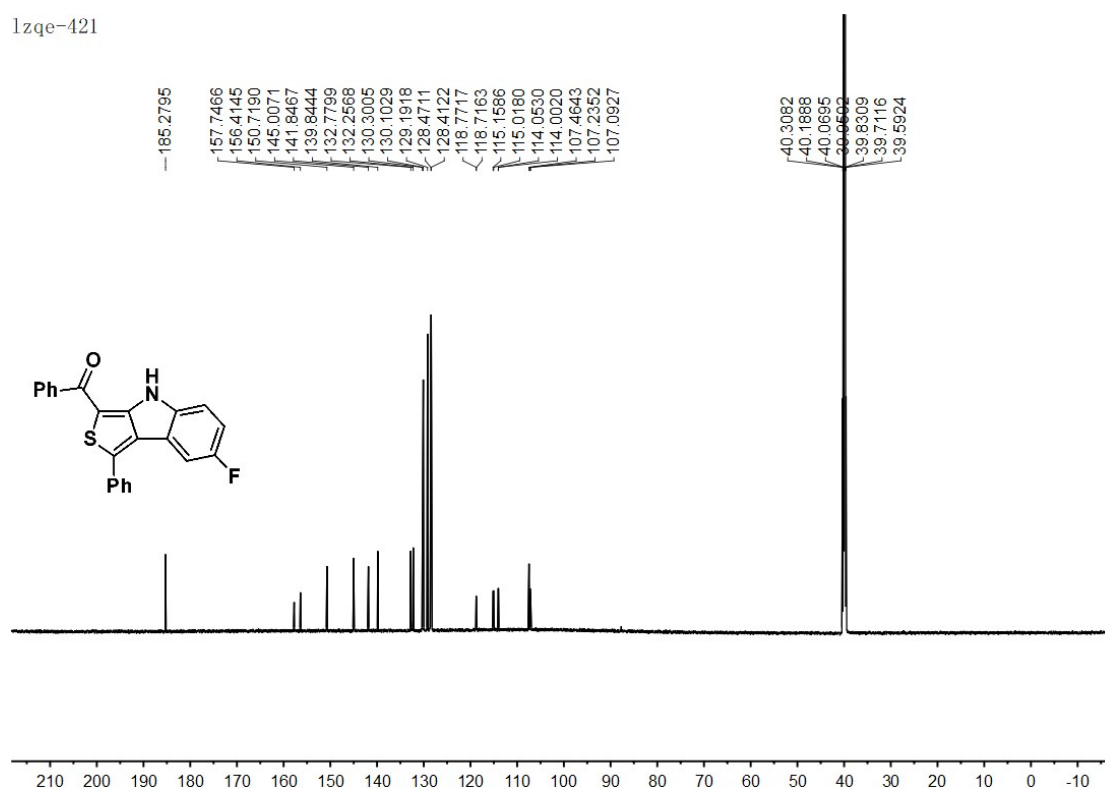

Figure S30. <sup>13</sup>C NMR spectrum of **2o** (d<sub>6</sub>-DMSO, 100 MHz).

lzqe-322

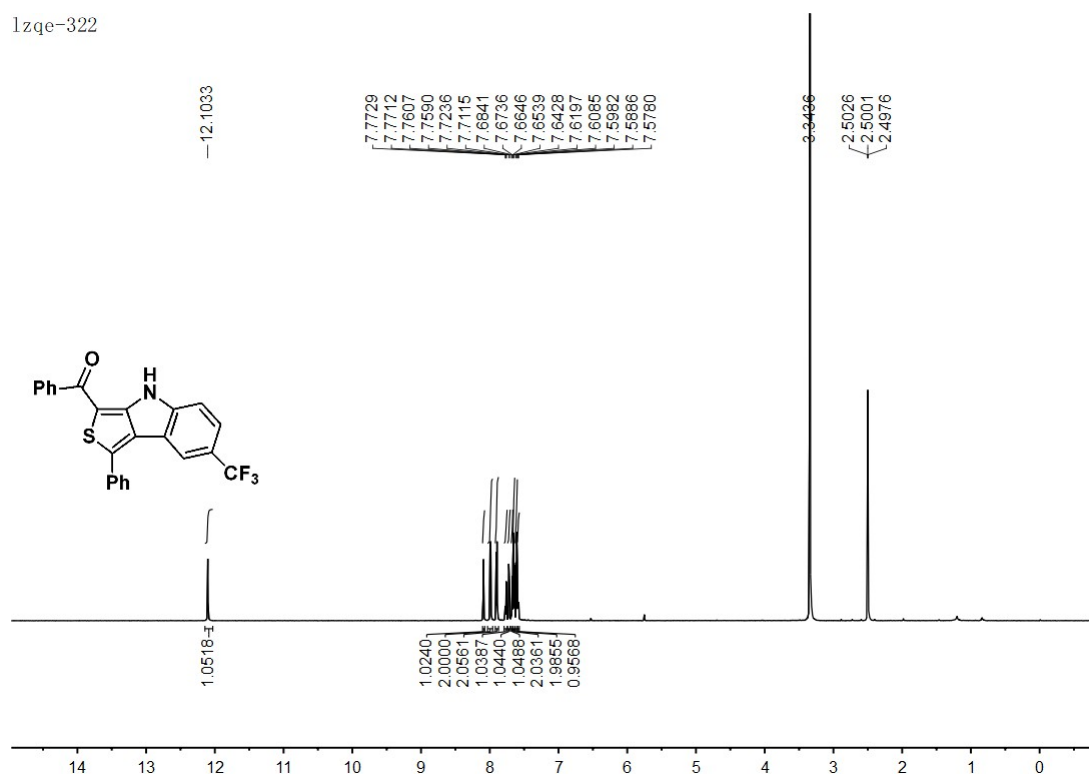

Figure S31. <sup>1</sup>H NMR spectrum of **2p** (d<sub>6</sub>-DMSO, 400 MHz).

lzqe-322

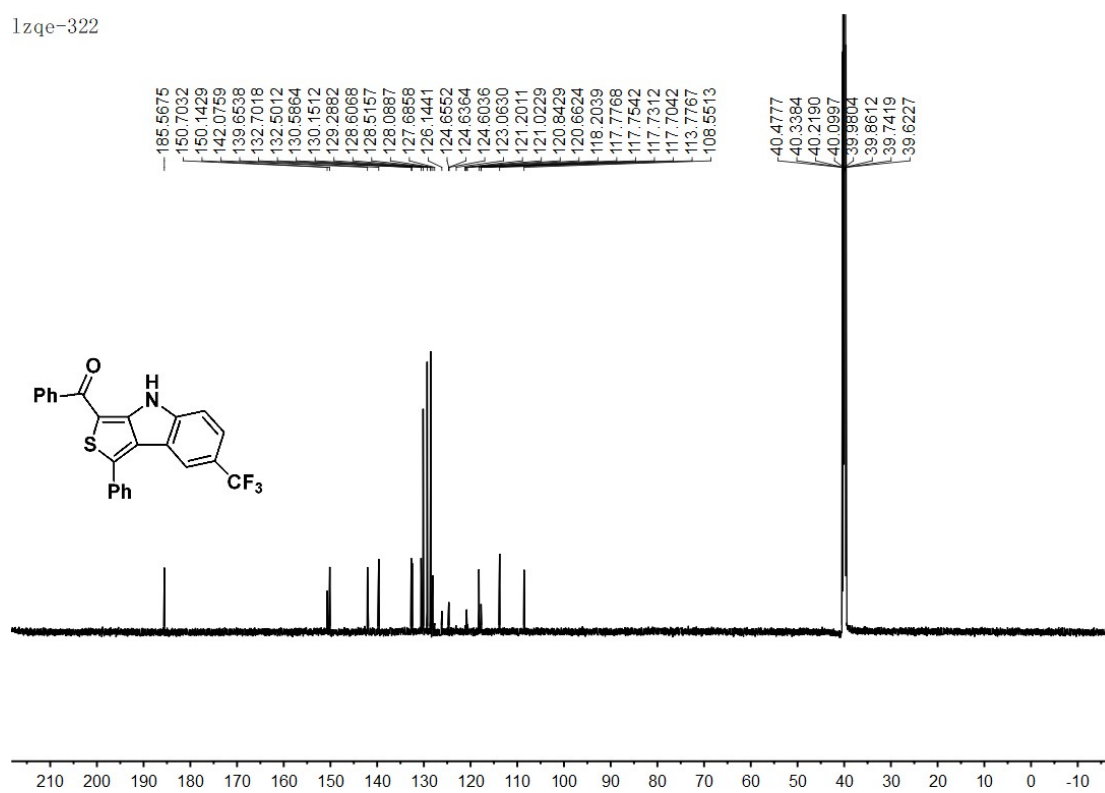

Figure S32. <sup>13</sup>C NMR spectrum of **2p** (d<sub>6</sub>-DMSO, 100 MHz).

LZQE-361

PROTON DMSO {D:\NMR400\203} nmr 46

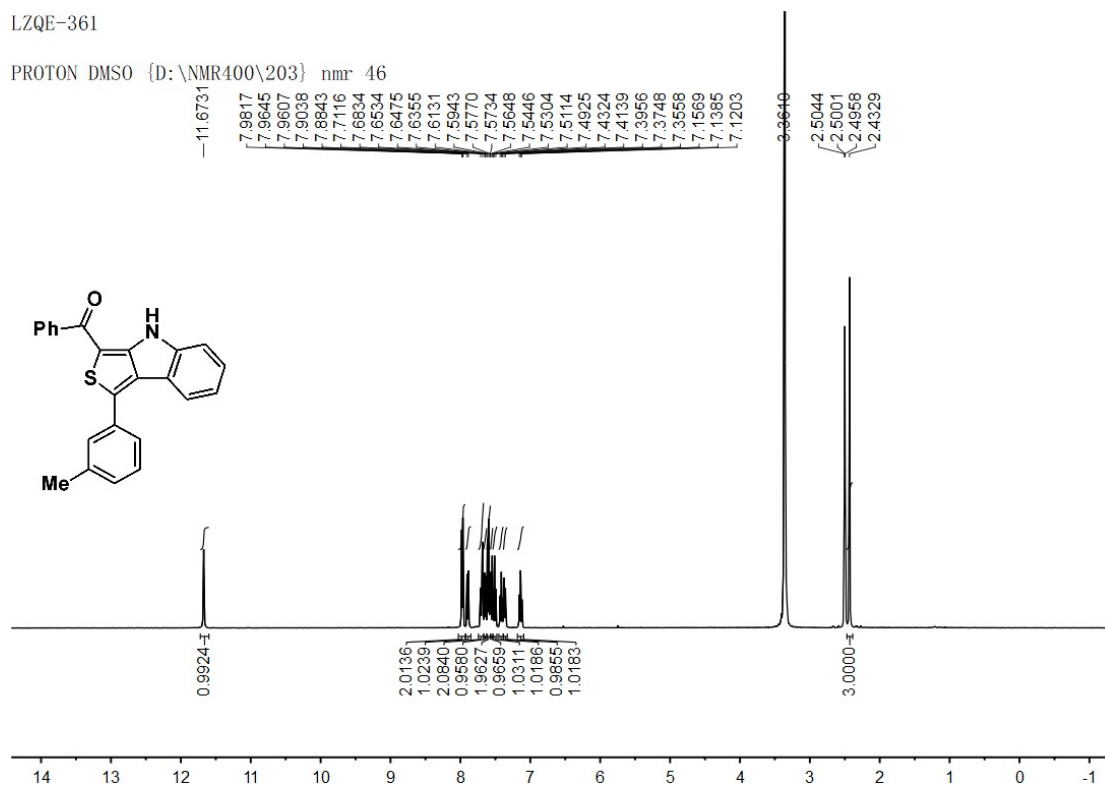

Figure S33. <sup>1</sup>H NMR spectrum of 2r (d6-DMSO, 400 MHz).

lzqe-361

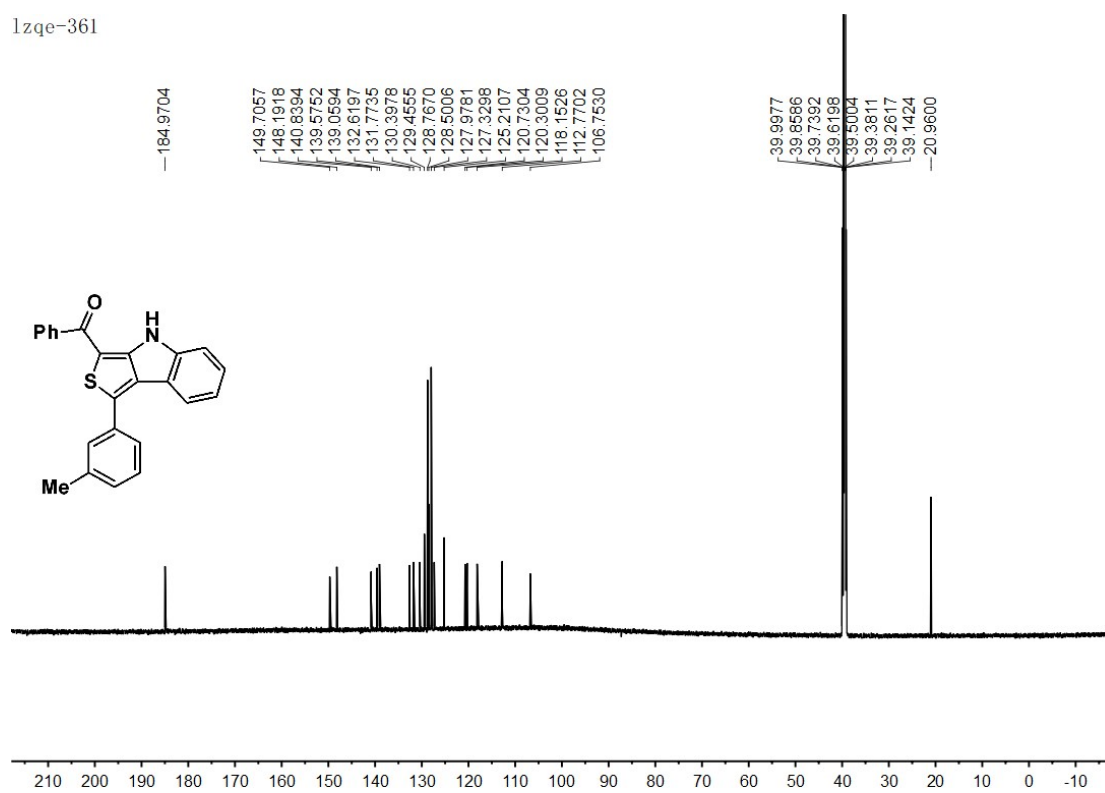

Figure S34. <sup>13</sup>C NMR spectrum of 2r (d6-DMSO, 100 MHz).

lzqe-319

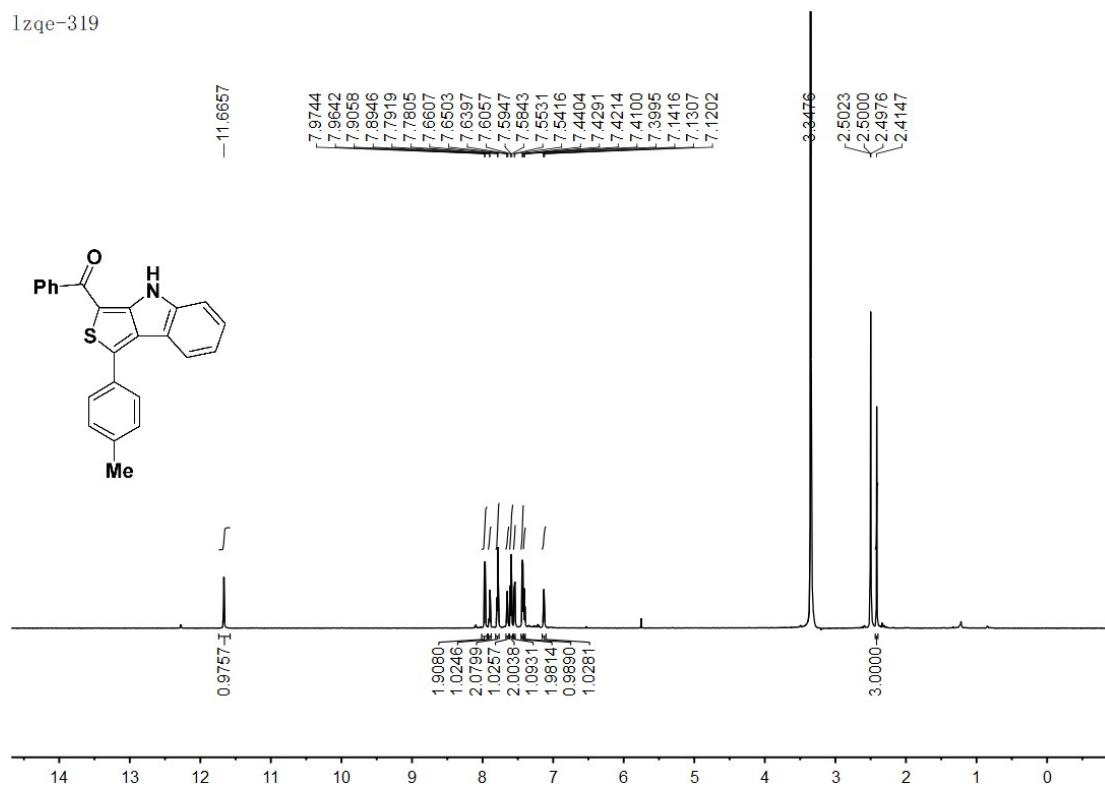

Figure S35. <sup>1</sup>H NMR spectrum of 2s (d<sub>6</sub>-DMSO, 400 MHz).

lzqe-319

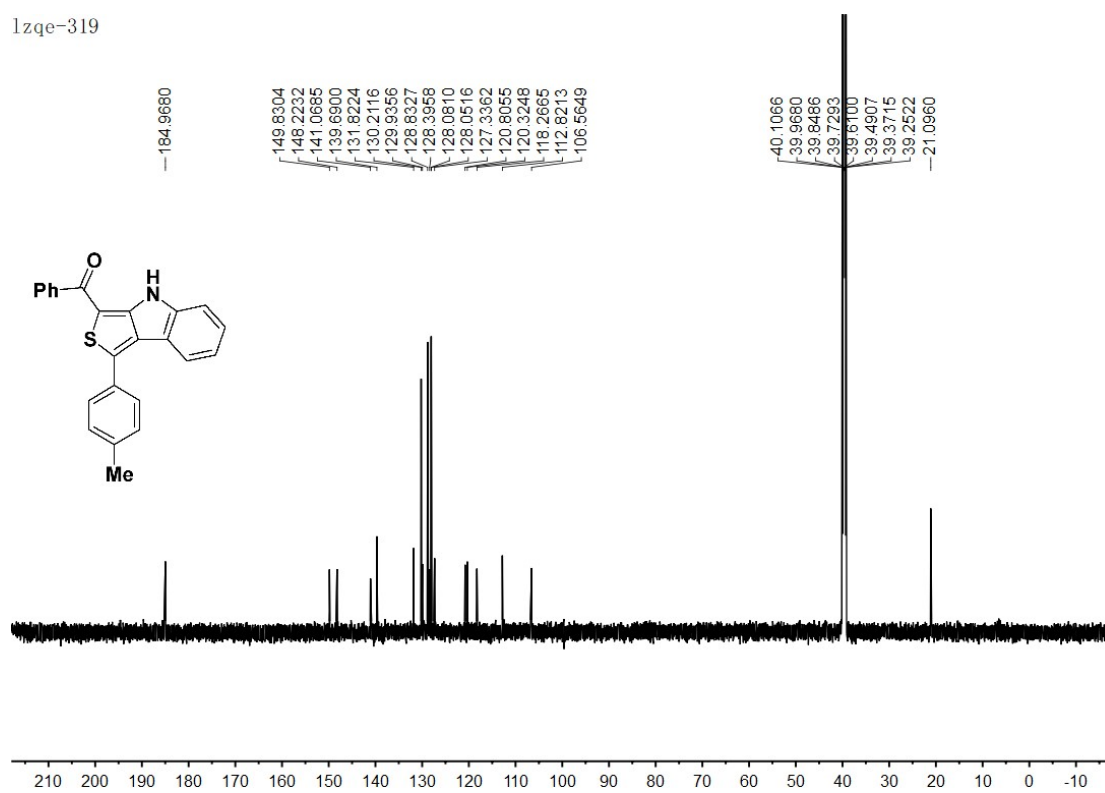

Figure S36. <sup>13</sup>C NMR spectrum of 2s (d<sub>6</sub>-DMSO, 100 MHz).

lzqe-318

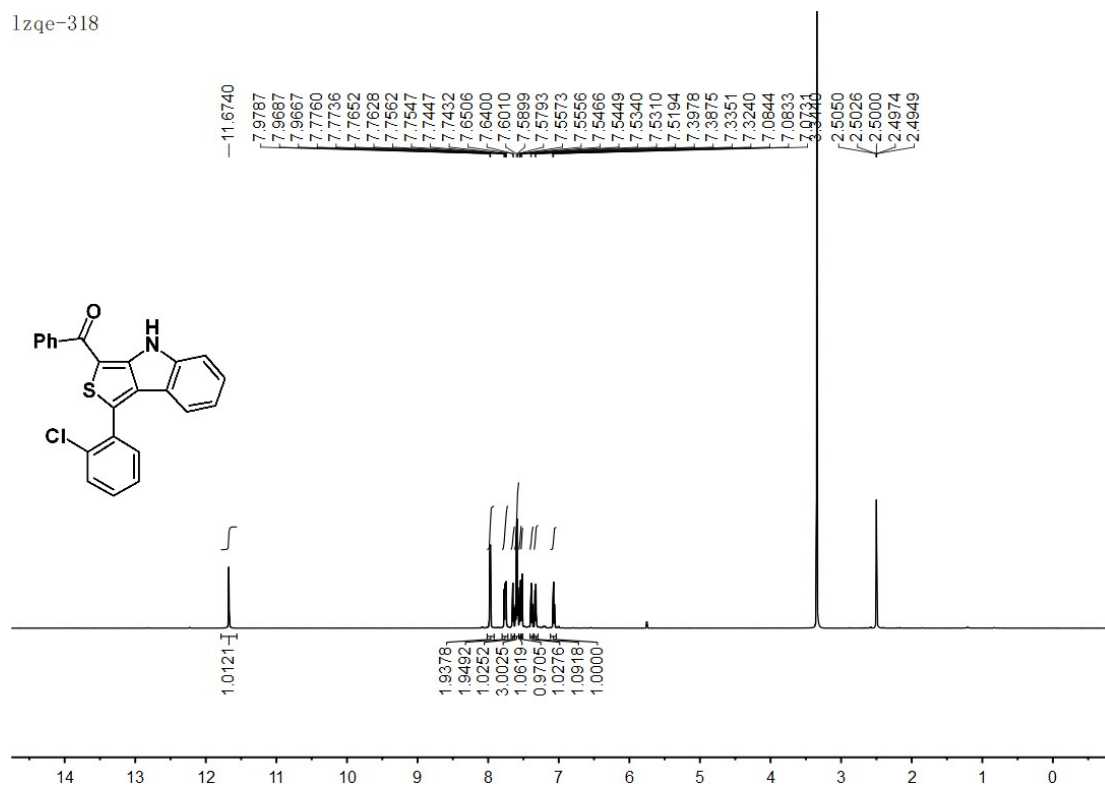

Figure S37. <sup>1</sup>H NMR spectrum of **2t** (d<sub>6</sub>-DMSO, 400 MHz).

lzqe-318

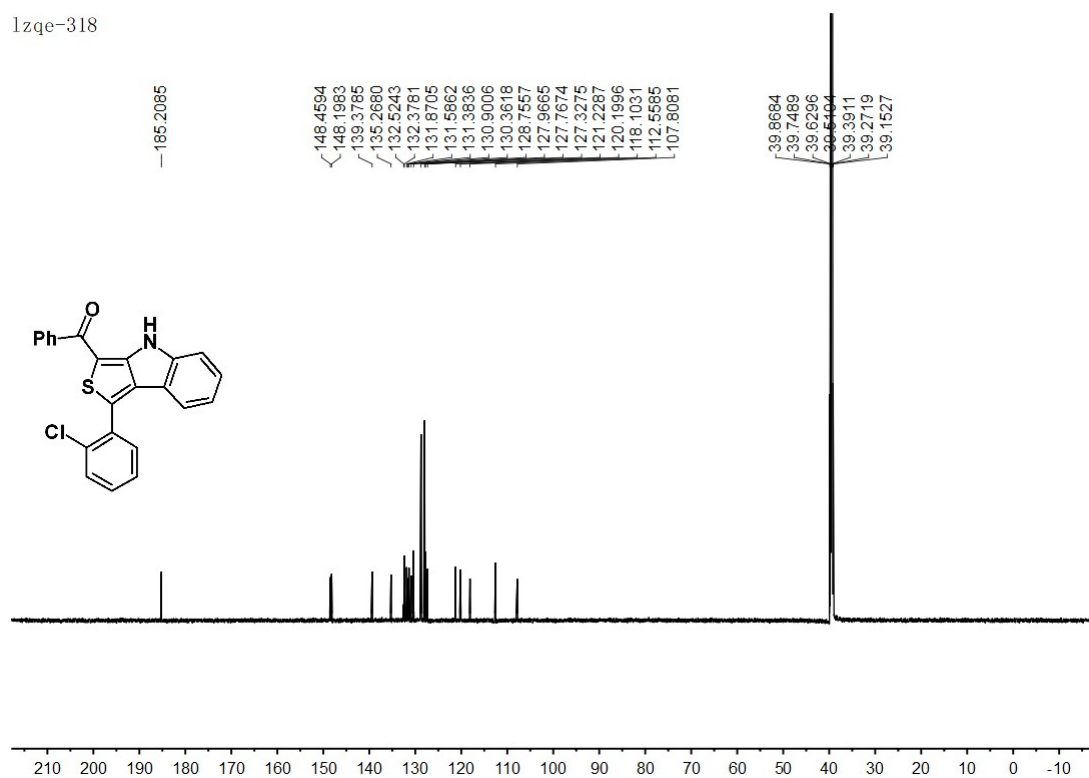

Figure S38. <sup>13</sup>C NMR spectrum of **2t** (d<sub>6</sub>-DMSO, 100 MHz).

LZQE-311

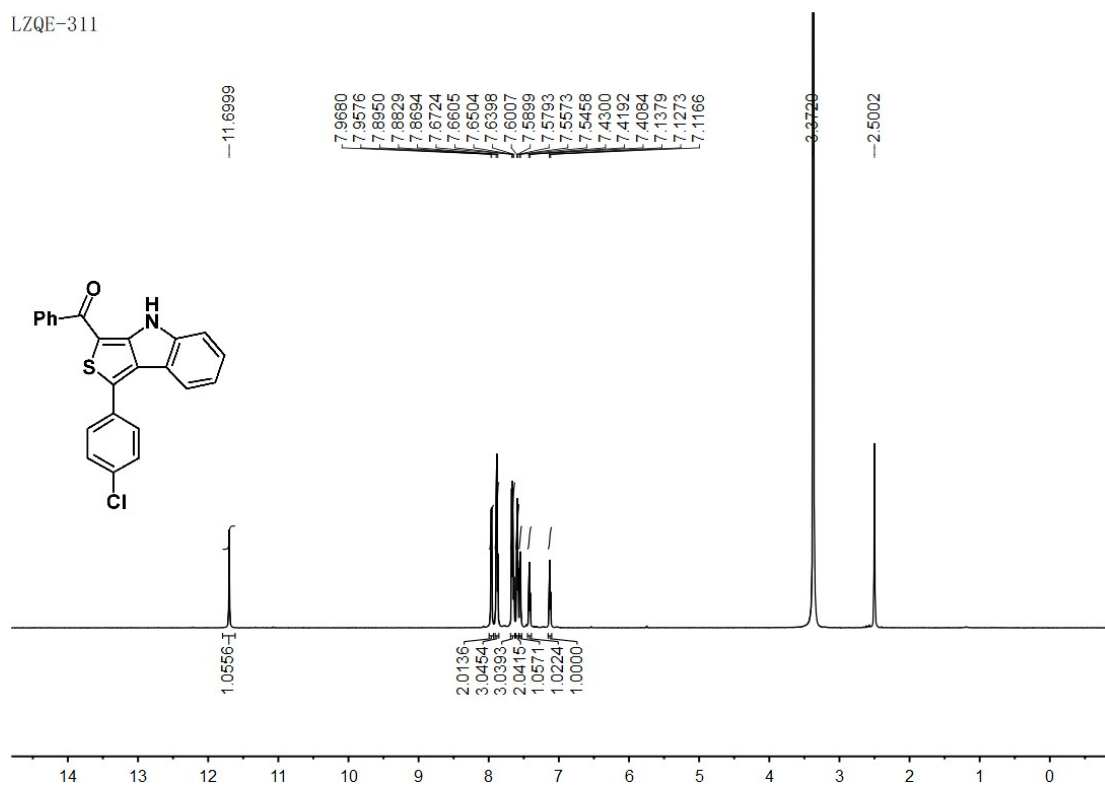

Figure S39. <sup>1</sup>H NMR spectrum of **2u** (d<sub>6</sub>-DMSO, 400 MHz).

LZQE-311

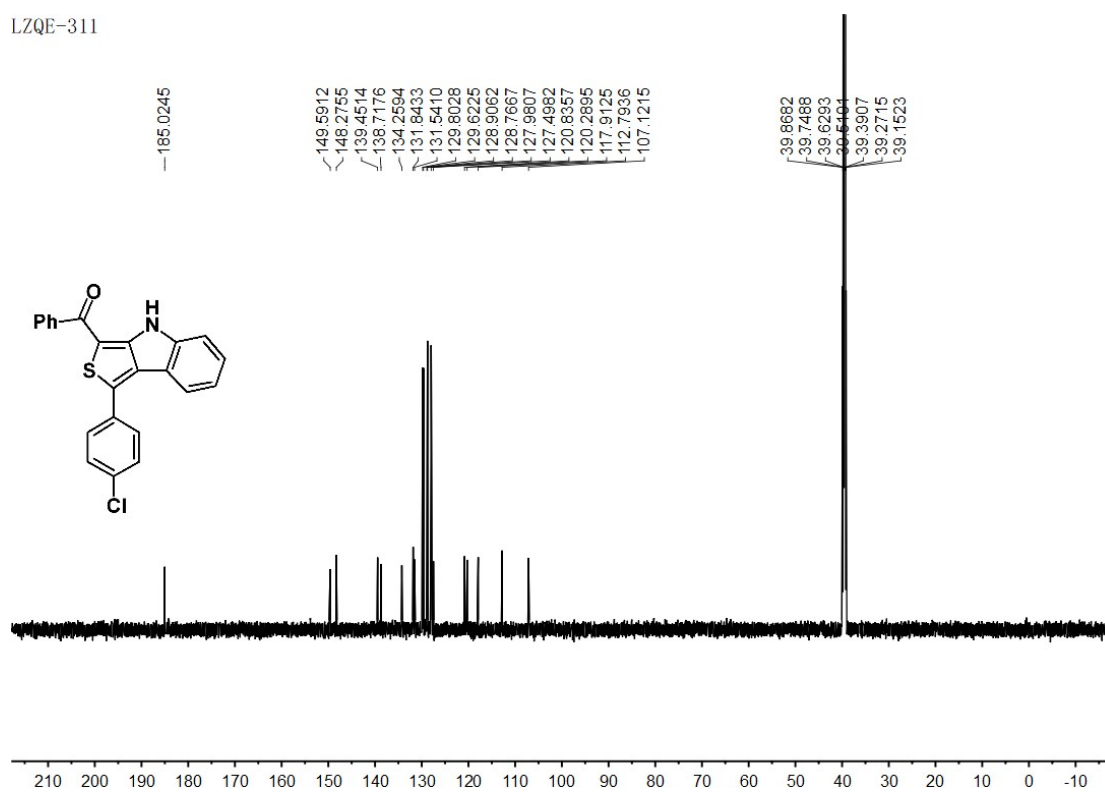

Figure S40. <sup>13</sup>C NMR spectrum of **2u** (d<sub>6</sub>-DMSO, 100 MHz).

lzqe-294

PROTON DMSO {D:\700NMR\203} NMR

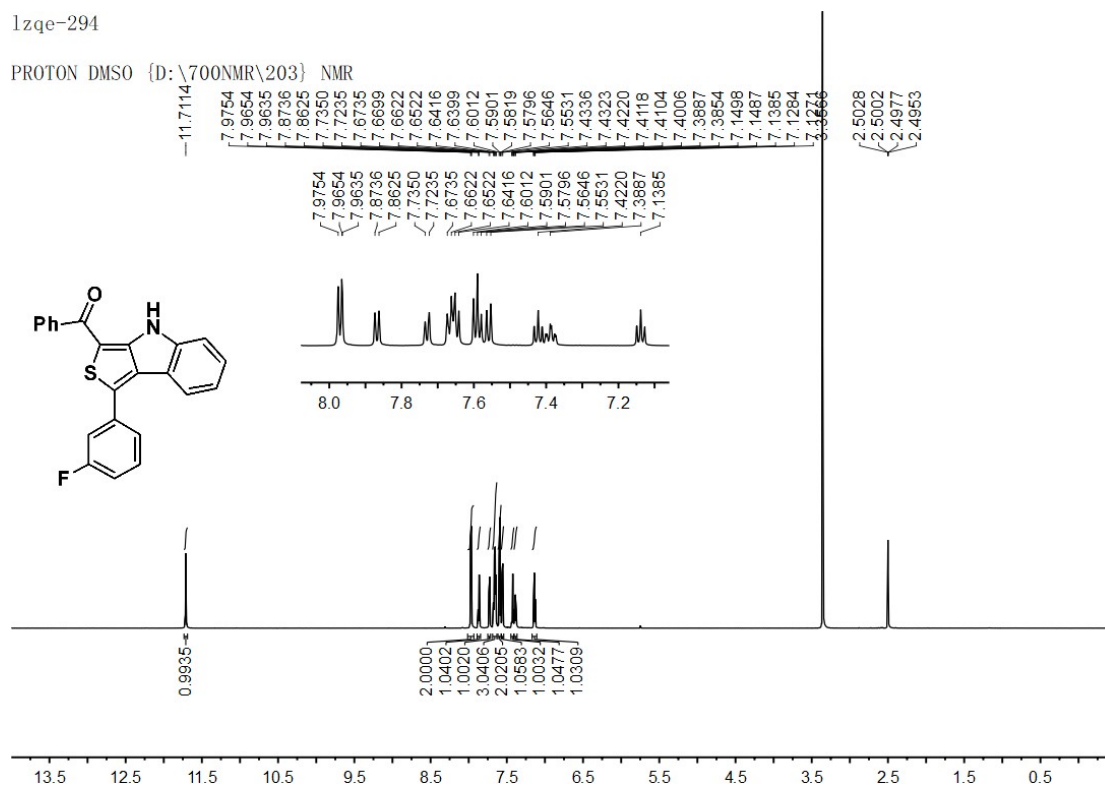

Figure S41. <sup>1</sup>H NMR spectrum of 2v (d6-DMSO, 400 MHz).

lzqe-294

PROTON DMSO {D:\700NMR\203} NMR

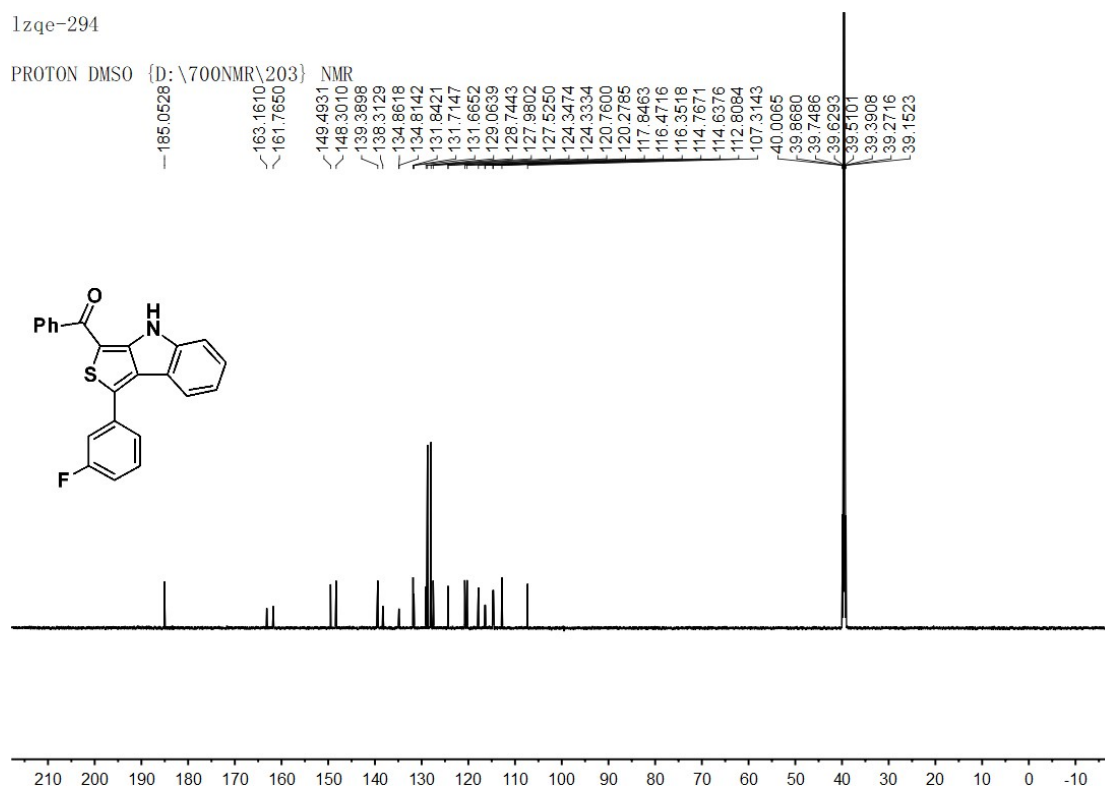

Figure S42. <sup>13</sup>C NMR spectrum of 2v (d6-DMSO, 100 MHz).



lzqe-326

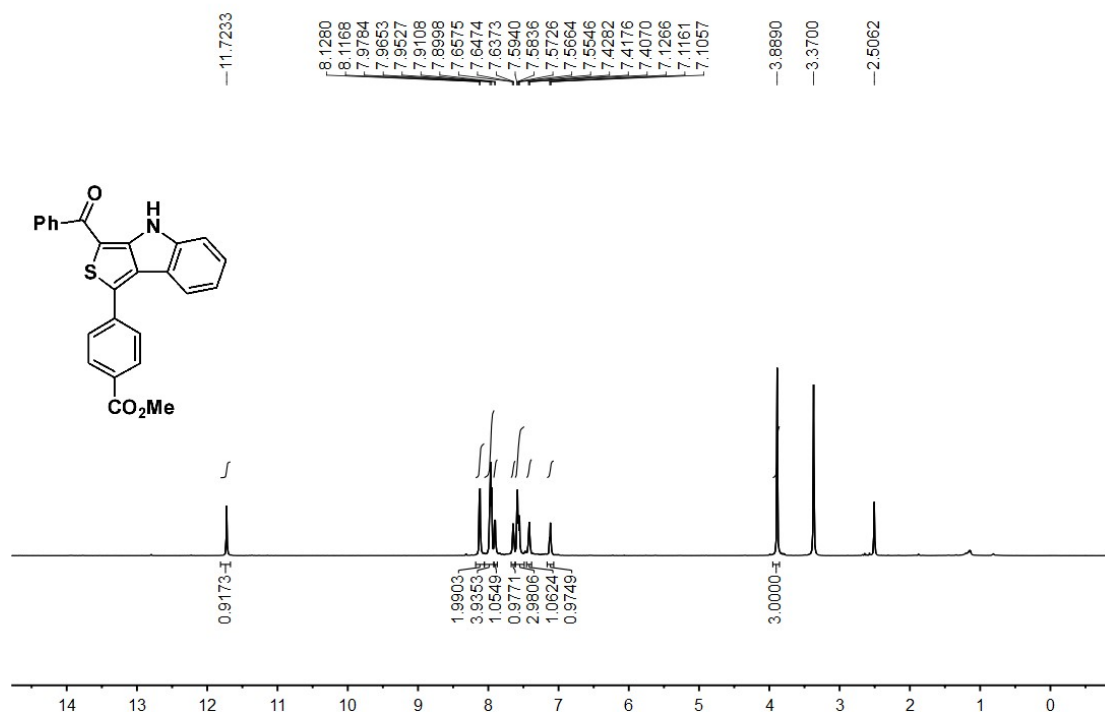

Figure S43. <sup>1</sup>H NMR spectrum of **2w** (d<sub>6</sub>-DMSO, 400 MHz).

lzqe-326

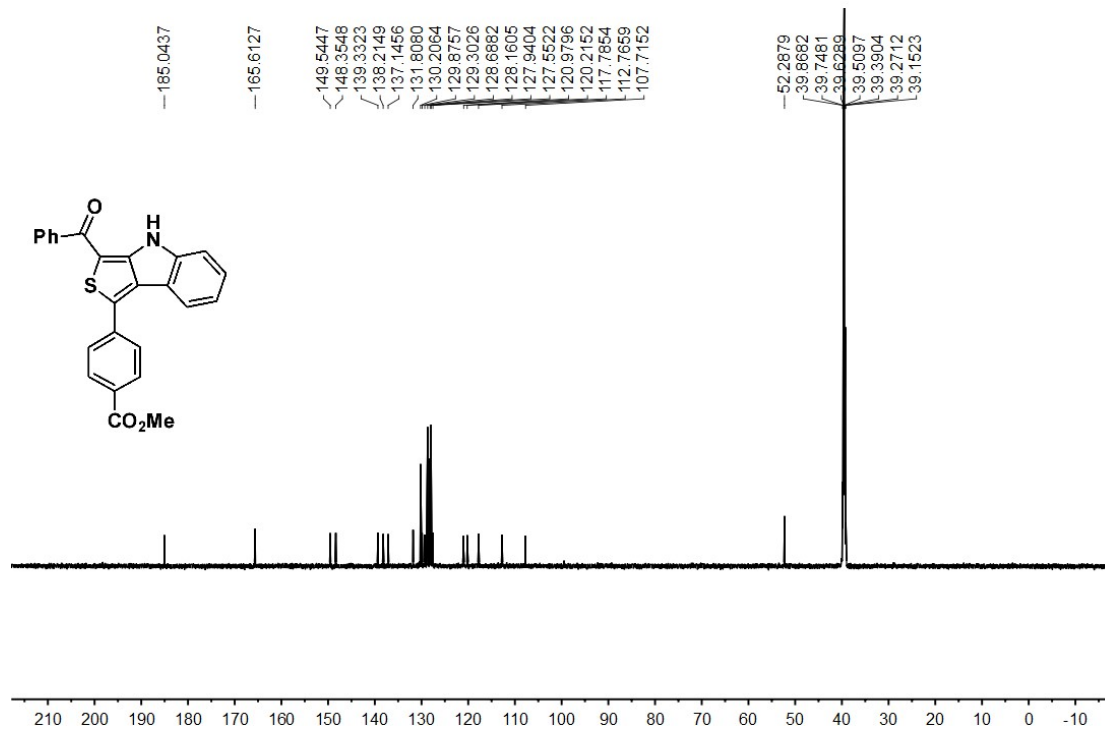

Figure S44. <sup>13</sup>C NMR spectrum of **2w** (d<sub>6</sub>-DMSO, 100 MHz).

lzqe-328

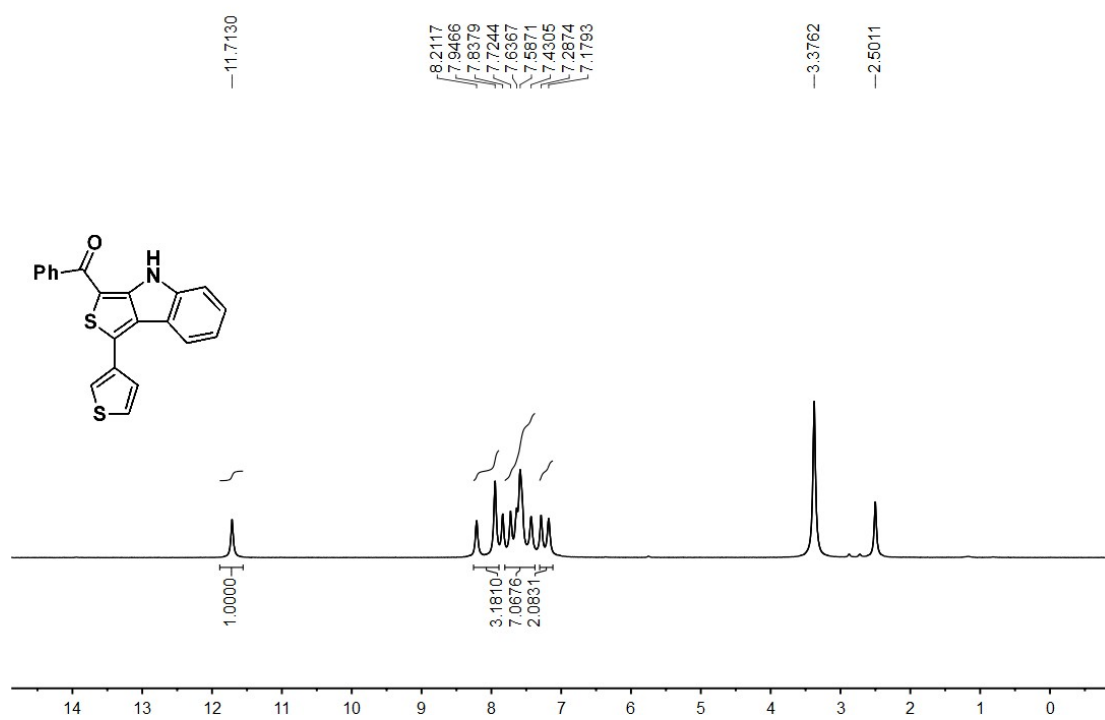

Figure S45. <sup>1</sup>H NMR spectrum of 2x (d<sub>6</sub>-DMSO, 400 MHz).

lzqe-328

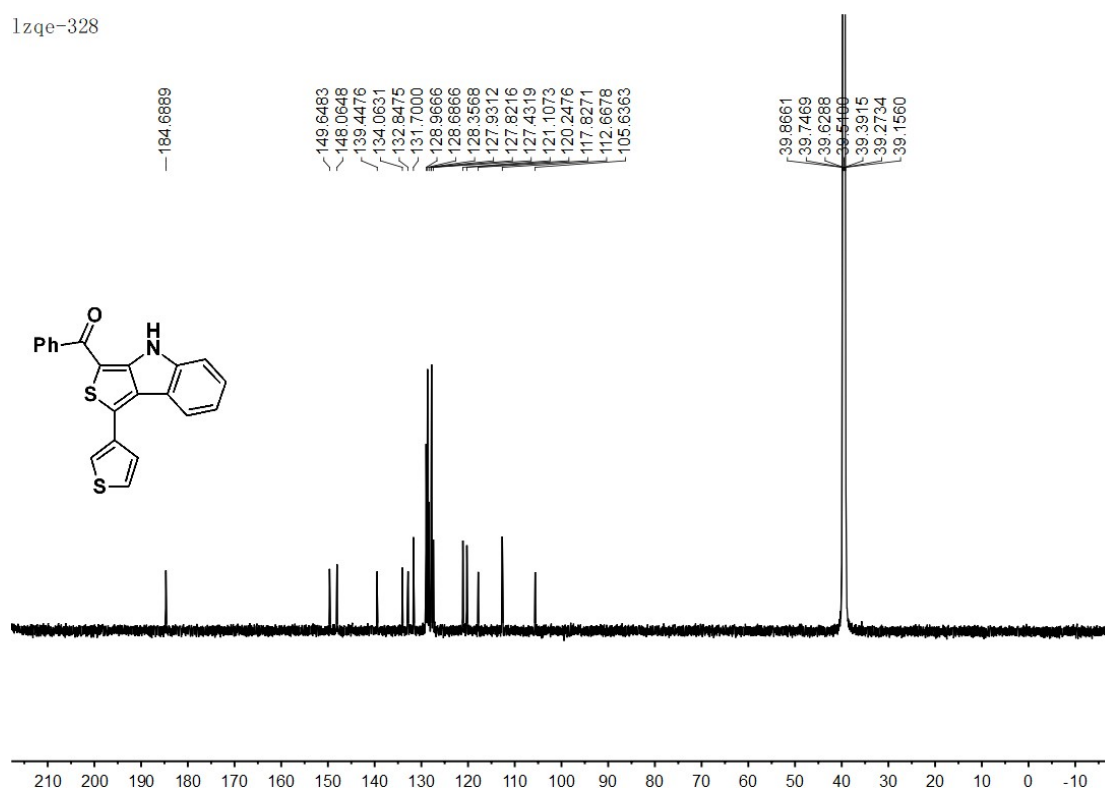

Figure S46. <sup>13</sup>C NMR spectrum of 2x (d<sub>6</sub>-DMSO, 100 MHz).

lzqe-330

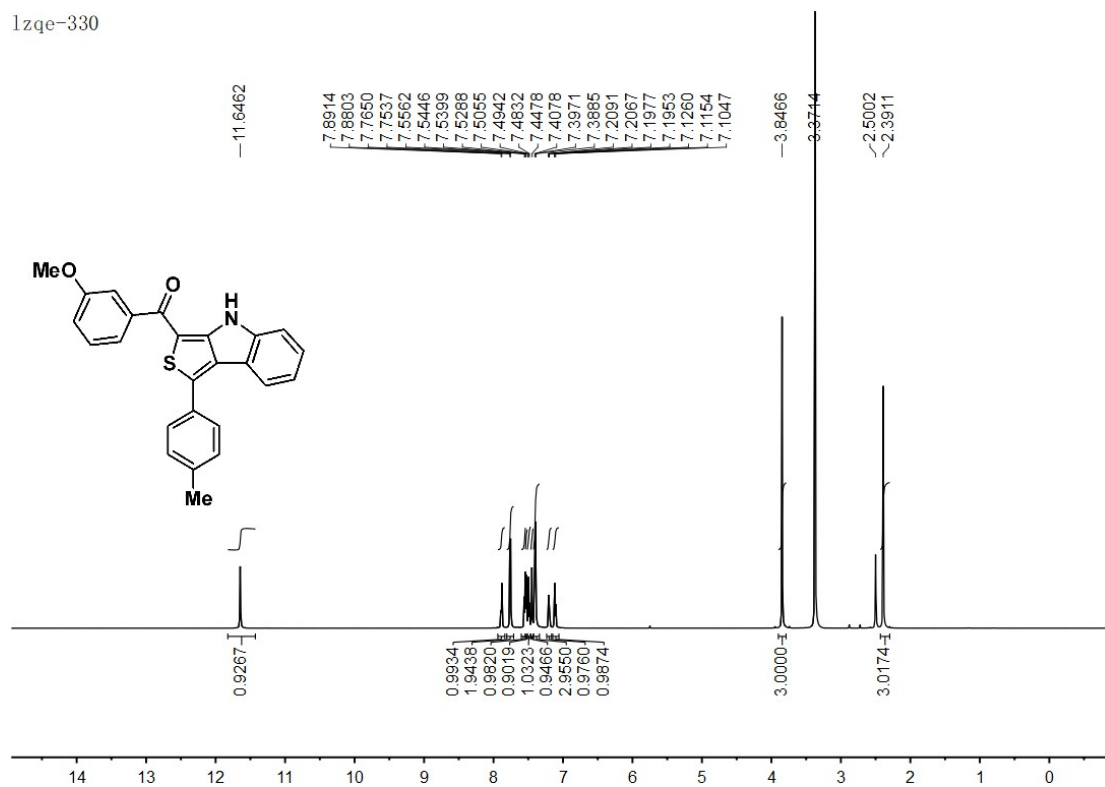

Figure S47. <sup>1</sup>H NMR spectrum of 2y (d<sub>6</sub>-DMSO, 400 MHz).

lzqe-330

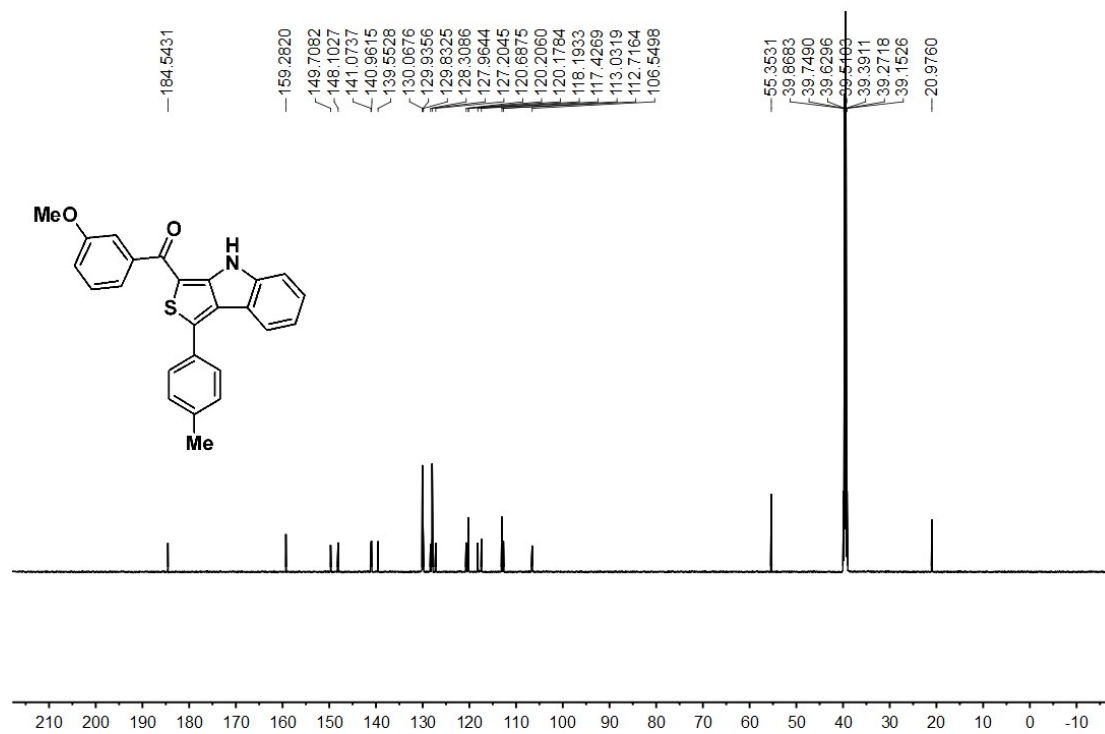

Figure S48. <sup>13</sup>C NMR spectrum of 2y (d<sub>6</sub>-DMSO, 100 MHz).

lzqe-331

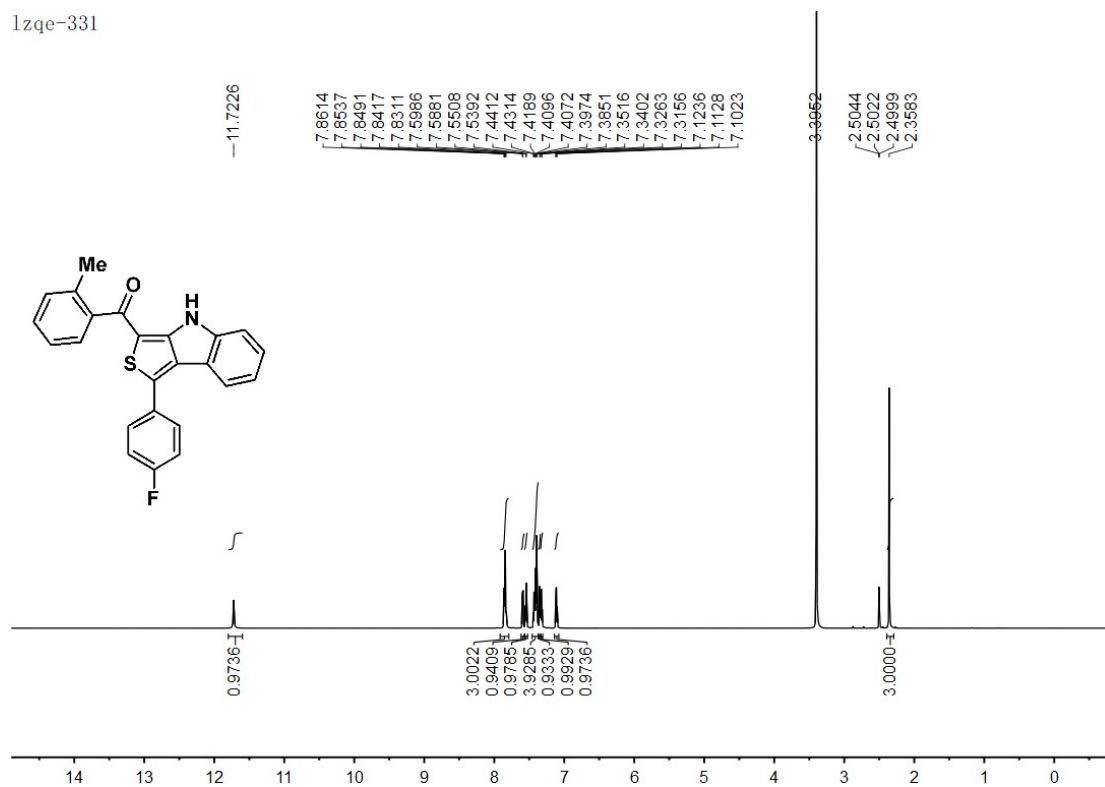

lzqe-331

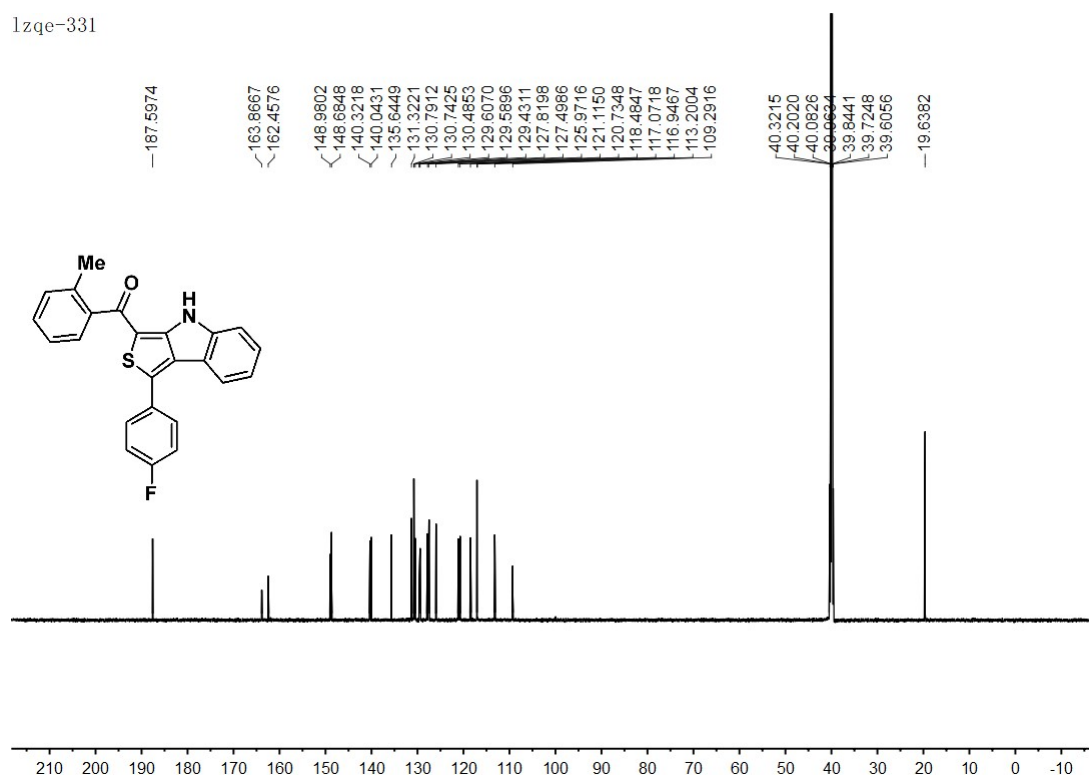

Supplement: d3qo00697b1.pdf [file d3qo00697b1.pdf]
